# Supplementary material
Source: publisher site journal article supplement (https://www.spandidos-publications.com/1936/downloadSupplementary)
Supplement: Supplementary file 2 [file downloadSupplementary]

## Sheet: Sheet1
Table SII. A list of 566 upregulated transcripts responsive to space radiation.
Gene ID	F-1G	F-µG	F-µG + melatonin	G + melatonin	G	NTname	SubjectID	Identity (%)	Name	Species
comp16181_c0_seq1	0.443437	0.274817	1.52396	0	0	DDR2_MOUSE_Discoidin_domain-containing_receptor_2_OS=Mus_musculus_GN=Ddr2_PE=1_SV=2	Q62371	77.24	discoidin domain receptor family, member 2(Ddr2)	Mus musculus
comp37818_c0_seq1	0.391207	0.0555299	0.477344	-0.559954	-0.303371	CC017_DANRE_Uncharacterized_protein_C3orf17_homolog_OS=Danio_rerio_GN=si:dkey-22a1.3_PE=2_SV=1	Q567G6	71.21	si:dkey-22a1.3(si:dkey-22a1.3)	Danio rerio
comp38783_c0_seq1	0.586028	-0.183542	0.558254	-0.559353	0.0214836	THYN1_DANRE_Thymocyte_nuclear_protein_1_OS=Danio_rerio_GN=thyn1_PE=2_SV=1	Q6PFL8	86.09	thymocyte nuclear protein 1(thyn1)	Danio rerio
comp39397_c0_seq1	0.434457	-0.176767	0.434442	-0.833277	-0.0150696	UBIM_PONAB_Ubiquitin-like_protein_FUBI_OS=Pongo_abelii_GN=FAU_PE=3_SV=1	P0C2F1	55.41	FAU, ubiquitin like and ribosomal protein S30 fusion(FAU)	Pongo abelii
comp44996_c0_seq1	0.322326	-0.073101	0.419665	-0.578313	-0.199211	IMP4_RAT_U3_small_nucleolar_ribonucleoprotein_protein_IMP4_OS=Rattus_norvegicus_GN=Imp4_PE=2_SV=1	Q5PQR5	76.63	IMP4 homolog, U3 small nucleolar ribonucleoprotein(Imp4)	Rattus norvegicus
comp45021_c0_seq1	0.384268	-0.0706758	0.356642	-0.775311	-0.277247	ISCA2_MOUSE_Iron-sulfur_cluster_assembly_2_homolog,_mitochondrial_OS=Mus_musculus_GN=Isca2_PE=2_SV=2	Q9DCB8	64.41	iron-sulfur cluster assembly 2(Isca2)	Mus musculus
comp45074_c0_seq2	0.32757	-0.120046	0.277222	-0.257408	-0.118008	ACADL_MOUSE_Long-chain_specific_acyl-CoA_dehydrogenase,_mitochondrial_OS=Mus_musculus_GN=Acadl_PE=2_SV=2	P51174	78.09	acyl-Coenzyme A dehydrogenase, long-chain(Acadl)	Mus musculus
comp45209_c0_seq1	0.457108	-0.0806292	0.310219	-0.862922	-0.194152	CL073_MOUSE_Uncharacterized_protein_C12orf73_homolog_OS=Mus_musculus_PE=2_SV=1	Q8BTC1	65.67	RIKEN cDNA 1190007I07 gene(1190007I07Rik)	Mus musculus
comp45569_c0_seq3	0.720057	-0.0950367	0.550457	-0.573908	-0.0657407	ACO13_MOUSE_Acyl-coenzyme_A_thioesterase_13_OS=Mus_musculus_GN=Acot13_PE=1_SV=1	Q9CQR4	71.63	acyl-CoA thioesterase 13(Acot13)	Mus musculus
comp45611_c0_seq1	0.449331	-0.668737	0.467415	-1.56027	-0.0737431	MLP3C_HUMAN_Microtubule-associated_proteins_1A/1B_light_chain_3C_OS=Homo_sapiens_GN=MAP1LC3C_PE=1_SV=1	Q9BXW4	68.25	microtubule associated protein 1 light chain 3 gamma(MAP1LC3C)	Homo sapiens
comp52025_c0_seq1	0.92526	-1.537	1.52485	-1.29095	0.111721	CBPC1_DANRE_Cytosolic_carboxypeptidase_1_OS=Danio_rerio_GN=agtpbp1_PE=2_SV=1	Q4U2V3	51.18	ATP/GTP binding protein 1(agtpbp1)	Danio rerio
comp59661_c0_seq1	0.31493	-0.0484444	0.558807	-0.27163	-0.137134	ANGP4_BOVIN_Angiopoietin-4_OS=Bos_taurus_GN=ANGPT4_PE=2_SV=1	Q24K15	67.29	angiopoietin 4(ANGPT4)	Bos taurus
comp60250_c0_seq1	0.411159	-0.250459	0.27767	-0.7883	-0.185773	NDUBA_BOVIN_NADH_dehydrogenase_[ubiquinone]_1_beta_subcomplex_subunit_10_OS=Bos_taurus_GN=NDUFB10_PE=1_SV=2	Q02373	62.35	NADH:ubiquinone oxidoreductase subunit B10(NDUFB10)	Bos taurus
comp60944_c0_seq1	0.443449	-0.0678657	0.355052	-0.744348	-0.0837657	NDUAA_HUMAN_NADH_dehydrogenase_[ubiquinone]_1_alpha_subcomplex_subunit_10,_mitochondrial_OS=Homo_sapiens_GN=NDUFA10_PE=1_SV=1	O95299	56.06	NADH:ubiquinone oxidoreductase subunit A10(NDUFA10)	Homo sapiens
comp61049_c0_seq1	0.459236	-0.0873969	0.467832	-0.203158	-0.0443652	NOG2_HUMAN_Nucleolar_GTP-binding_protein_2_OS=Homo_sapiens_GN=GNL2_PE=1_SV=1	Q13823	65.99	G protein nucleolar 2(GNL2)	Homo sapiens
comp61953_c0_seq3	0.203366	-0.104562	0.282524	-1.08034	-0.342208	TR112_MOUSE_tRNA_methyltransferase_112_homolog_OS=Mus_musculus_GN=Trmt112_PE=2_SV=1	Q9DCG9	62.6	tRNA methyltransferase 11-2(Trmt112)	Mus musculus
comp62954_c1_seq1	2.14052	0	0.969838	0	0.341669	METK2_RAT_S-adenosylmethionine_synthase_isoform_type-2_OS=Rattus_norvegicus_GN=Mat2a_PE=1_SV=1	P18298	94.74	methionine adenosyltransferase 2A(Mat2a)	Rattus norvegicus
comp64829_c0_seq2	0.423955	-0.639351	0.477636	-0.515178	-0.00214752	NLE1_BOVIN_Notchless_protein_homolog_1_OS=Bos_taurus_GN=NLE1_PE=2_SV=2	Q58D20	83.82	notchless homolog 1(NLE1)	Bos taurus
comp64956_c0_seq2	0.491852	-0.376051	0.488855	-0.535065	-0.0817919	HSBP1_PONAB_Heat_shock_factor-binding_protein_1_OS=Pongo_abelii_GN=HSBP1_PE=3_SV=1	Q5RDI2	86.67	heat shock factor binding protein 1(HSBP1)	Pongo abelii
comp65045_c0_seq1	0.430814	-0.0301574	0.433293	-0.632869	-0.0397536	OSGEP_XENLA_Probable_tRNA_threonylcarbamoyladenosine_biosynthesis_protein_osgep_OS=Xenopus_laevis_GN=osgep_PE=2_SV=1	Q7SYR1	86.57	O-sialoglycoprotein endopeptidase L homeolog(osgep.L)	Xenopus laevis
comp65265_c0_seq2	0.33738	-0.060288	0.470978	-0.602104	-0.476397	MMAC_DANRE_Methylmalonic_aciduria_and_homocystinuria_type_C_protein_homolog_OS=Danio_rerio_GN=mmachc_PE=2_SV=2	Q5RFU5	75.6	methylmalonic aciduria (cobalamin deficiency) cblC type, with homocystinuria(mmachc)	Danio rerio
comp65398_c0_seq1	0.298972	0.0601179	0.485453	-0.563669	-0.0812484	COQ7_MOUSE_Ubiquinone_biosynthesis_protein_COQ7_homolog_OS=Mus_musculus_GN=Coq7_PE=2_SV=3	P97478	73.14	demethyl-Q 7(Coq7)	Mus musculus
comp65603_c1_seq2	0.405478	-0.313815	0.328278	-1.05628	-0.0964425	QCR7_MOUSE_Cytochrome_b-c1_complex_subunit_7_OS=Mus_musculus_GN=Uqcrb_PE=1_SV=3	Q9D855	77.89	ubiquinol-cytochrome c reductase binding protein(Uqcrb)	Mus musculus
comp66029_c0_seq1	0.485104	-0.136414	0.798647	-0.85756	0.0992823	ST6B1_MOUSE_Sulfotransferase_6B1_OS=Mus_musculus_GN=Sult6b1_PE=1_SV=1	P0CC03	46.9	sulfotransferase family, cytosolic, 6B, member 1(Sult6b1)	Mus musculus
comp66254_c0_seq1	0.418819	-0.264564	0.508526	-0.640869	0.0124598	SODM_MACFA_Superoxide_dismutase_[Mn],_mitochondrial_OS=Macaca_fascicularis_GN=SOD2_PE=2_SV=3	Q8HXP3	83.33	superoxide dismutase 2, mitochondrial(SOD2)	Macaca fascicularis
comp66453_c0_seq1	0.618943	-0.0692447	0.97165	-1.53836	0.0331275	LECT2_MOUSE_Leukocyte_cell-derived_chemotaxin-2_OS=Mus_musculus_GN=Lect2_PE=1_SV=1	O88803	57.69	leukocyte cell-derived chemotaxin 2(Lect2)	Mus musculus
comp66795_c0_seq2	0.601009	-0.00464265	0.490306	-1.3868	-0.359035	EMP3_HUMAN_Epithelial_membrane_protein_3_OS=Homo_sapiens_GN=EMP3_PE=2_SV=1	P54852	50.91	epithelial membrane protein 3(EMP3)	Homo sapiens
comp66824_c0_seq2	0.425211	-0.146435	0.43571	-1.03344	-0.0884328	PSMG4_HUMAN_Proteasome_assembly_chaperone_4_OS=Homo_sapiens_GN=PSMG4_PE=2_SV=2	Q5JS54	57.52	proteasome assembly chaperone 4(PSMG4)	Homo sapiens
comp66940_c0_seq1	0.157441	-0.216817	0.263018	-0.827474	-0.221278	IF1AX_PONAB_Eukaryotic_translation_initiation_factor_1A,_X-chromosomal_OS=Pongo_abelii_GN=EIF1AX_PE=2_SV=3	Q5RA42	96.51	eukaryotic translation initiation factor 1A, X-linked(EIF1AX)	Pongo abelii
comp67009_c0_seq1	0.590153	-0.0793287	0.4963	-0.439749	0.0100447	CH055_DANRE_UPF0670_protein_C8orf55_homolog_OS=Danio_rerio_GN=si:ch73-52e5.2_PE=2_SV=1	B0JZP3	67.02	si:ch73-52e5.2(si:ch73-52e5.2)	Danio rerio
comp67026_c0_seq1	0.578681	-0.465533	0.797095	-0.250939	0.0110513	SETX_MOUSE_Probable_helicase_senataxin_OS=Mus_musculus_GN=Setx_PE=2_SV=1	A2AKX3	61.36	senataxin(Setx)	Mus musculus
comp67559_c0_seq2	0.242636	-0.211159	0.42565	-2.04182	-0.629648	F165B_BOVIN_Protein_FAM165B_OS=Bos_taurus_GN=FAM165B_PE=3_SV=1	A6H770	54.39	small integral membrane protein 11A(SMIM11A)	Bos taurus
comp67634_c0_seq2	0.482785	-0.231642	0.366173	-0.967133	-0.111172	RL36A_TAKRU_60S_ribosomal_protein_L36a_OS=Takifugu_rubripes_GN=rpl36a_PE=3_SV=2	P61486	99.06	60S ribosomal protein L36a(LOC101061283)	Takifugu rubripes
comp67766_c0_seq3	0.333399	0.0396759	0.429486	-0.556164	-0.517793	PARP6_HUMAN_Poly_[ADP-ribose]_polymerase_6_OS=Homo_sapiens_GN=PARP6_PE=2_SV=1	Q2NL67	73.41	poly(ADP-ribose) polymerase family member 6(PARP6)	Homo sapiens
comp67897_c0_seq1	0.372553	-0.0610332	0.420186	-0.673108	-0.124744	COMD8_HUMAN_COMM_domain-containing_protein_8_OS=Homo_sapiens_GN=COMMD8_PE=1_SV=1	Q9NX08	51.74	COMM domain containing 8(COMMD8)	Homo sapiens
comp68015_c0_seq1	0.45151	-0.545729	0.436787	-0.620639	0.0439798	MOCS3_DANRE_Adenylyltransferase_and_sulfurtransferase_MOCS3_OS=Danio_rerio_GN=mocs3_PE=2_SV=1	Q8AWD2	77.06	molybdenum cofactor synthesis 3(mocs3)	Danio rerio
comp68209_c0_seq1	0.172053	0.0138283	0.427271	-0.737447	-0.264783	RRS1_BOVIN_Ribosome_biogenesis_regulatory_protein_homolog_OS=Bos_taurus_GN=RRS1_PE=2_SV=1	Q2KIH4	67.74	ribosome biogenesis regulator homolog(RRS1)	Bos taurus
comp68228_c0_seq1	0.372694	-1.4147	0.323744	0.169988	-0.483777	RL37_RAT_60S_ribosomal_protein_L37_OS=Rattus_norvegicus_GN=Rpl37_PE=1_SV=2	P61928	97.83	ribosomal protein L37(Rpl37)	Rattus norvegicus
comp68488_c0_seq1	0.395553	0.0156921	0.478402	-0.415825	-0.0760895	EFTS_DANRE_Elongation_factor_Ts,_mitochondrial_OS=Danio_rerio_GN=tsfm_PE=2_SV=1	A1A5Z3	85.25	Ts translation elongation factor, mitochondrial(tsfm)	Danio rerio
comp68807_c1_seq2	0.620306	-0.635965	0.295303	-2.26729	-0.130294	RS29_ICTPU_40S_ribosomal_protein_S29_OS=Ictalurus_punctatus_GN=rps29_PE=3_SV=3	Q90YP2	98.21	ribosomal protein S29(rps29)	Ictalurus punctatus
comp68807_c1_seq8	0.562407	-0.654932	0.274692	-2.32121	-0.152173	RS29_ICTPU_40S_ribosomal_protein_S29_OS=Ictalurus_punctatus_GN=rps29_PE=3_SV=3	Q90YP2	98.21	ribosomal protein S29(rps29)	Ictalurus punctatus
comp68887_c0_seq1	0.359619	-0.0190314	0.484183	-0.744065	-0.0864865	RM15_DANRE_39S_ribosomal_protein_L15,_mitochondrial_OS=Danio_rerio_GN=mrpl15_PE=2_SV=1	Q6DGM3	85.14	mitochondrial ribosomal protein L15(mrpl15)	Danio rerio
comp68918_c0_seq1	0.312061	-0.235896	0.422904	-0.842608	-0.124699	GLRX2_BOVIN_Glutaredoxin-2,_mitochondrial_OS=Bos_taurus_GN=GLRX2_PE=2_SV=1	Q32L67	55.56	glutaredoxin 2(GLRX2)	Bos taurus
comp69119_c0_seq2	0.423052	-0.0139799	0.450608	-0.402807	-0.015645	DCNL5_BOVIN_DCN1-like_protein_5_OS=Bos_taurus_GN=DCUN1D5_PE=2_SV=1	Q1RMX9	79.15	defective in cullin neddylation 1 domain containing 5(DCUN1D5)	Bos taurus
comp69126_c0_seq2	0.46294	-0.0995593	0.447409	-0.911771	-0.143016	RM22_XENTR_39S_ribosomal_protein_L22,_mitochondrial_OS=Xenopus_tropicalis_GN=mrpl22_PE=2_SV=1	Q0VFH6	80.11	mitochondrial ribosomal protein L22(mrpl22)	Xenopus tropicalis
comp69344_c0_seq4	0.342874	-0.0934892	0.3679	-0.664041	-0.0921569	THAP3_HUMAN_THAP_domain-containing_protein_3_OS=Homo_sapiens_GN=THAP3_PE=1_SV=1	Q8WTV1	38.21	THAP domain containing 3(THAP3)	Homo sapiens
comp69738_c0_seq2	0.326104	-0.077527	0.389329	-0.986099	-0.0874318	ENY2_DANRE_Enhancer_of_yellow_2_transcription_factor_homolog_OS=Danio_rerio_GN=eny2_PE=2_SV=1	Q6DH42	95.79	enhancer of yellow 2 homolog (Drosophila)(eny2)	Danio rerio
comp69787_c0_seq1	0.243293	-0.0909235	0.355995	-0.485417	-0.188131	ISCU_MOUSE_Iron-sulfur_cluster_assembly_enzyme_ISCU,_mitochondrial_OS=Mus_musculus_GN=Iscu_PE=1_SV=1	Q9D7P6	83.8	iron-sulfur cluster assembly enzyme(Iscu)	Mus musculus
comp69790_c1_seq1	0.214477	-0.104907	0.468108	-0.789583	-0.197717	DYR_MOUSE_Dihydrofolate_reductase_OS=Mus_musculus_GN=Dhfr_PE=1_SV=3	P00375	62.43	dihydrofolate reductase(Dhfr)	Mus musculus
comp69808_c0_seq6	0.483031	-0.496937	0.885864	-0.270966	0.0812404	THIKA_MOUSE_3-ketoacyl-CoA_thiolase_A,_peroxisomal_OS=Mus_musculus_GN=Acaa1a_PE=2_SV=1	Q921H8	62.74	acetyl-Coenzyme A acyltransferase 1A(Acaa1a)	Mus musculus
comp70176_c0_seq1	0.581175	-0.083182	0.650169	-0.457742	-0.196424	CD052_HUMAN_Uncharacterized_protein_C4orf52_OS=Homo_sapiens_GN=C4orf52_PE=1_SV=2	Q8N5G0	59.7	small integral membrane protein 20(SMIM20)	Homo sapiens
comp70224_c0_seq1	0.210895	-0.277346	0.163953	-1.62661	-0.235663	GLT14_HUMAN_Polypeptide_N-acetylgalactosaminyltransferase_14_OS=Homo_sapiens_GN=GALNT14_PE=2_SV=1	Q96FL9	63.53	polypeptide N-acetylgalactosaminyltransferase 14(GALNT14)	Homo sapiens
comp70299_c0_seq3	0.295582	-0.0273396	0.387863	-0.394792	-0.323693	YIPF1_PONAB_Protein_YIPF1_OS=Pongo_abelii_GN=YIPF1_PE=2_SV=1	Q5RBL0	55.63	Yip1 domain family member 1(YIPF1)	Pongo abelii
comp70316_c2_seq1	0.141761	-0.335893	0.0869703	0.378135	-0.491426	LTBP3_HUMAN_Latent-transforming_growth_factor_beta-binding_protein_3_OS=Homo_sapiens_GN=LTBP3_PE=1_SV=4	Q9NS15	66.47	latent transforming growth factor beta binding protein 3(LTBP3)	Homo sapiens
comp70333_c1_seq2	0.590151	-0.369361	0.52957	-0.569839	-0.0557264	FKBP2_MOUSE_Peptidyl-prolyl_cis-trans_isomerase_FKBP2_OS=Mus_musculus_GN=Fkbp2_PE=1_SV=1	P45878	93.33	FK506 binding protein 2(Fkbp2)	Mus musculus
comp70544_c0_seq1	0.432034	-0.0856091	0.457207	-0.735383	-0.113036	RBX2_MOUSE_RING-box_protein_2_OS=Mus_musculus_GN=Rnf7_PE=2_SV=1	Q9WTZ1	90.27	ring finger protein 7(Rnf7)	Mus musculus
comp70560_c0_seq1	0.619754	-0.030842	0.458707	-0.59559	-0.00296625	MET10_DANRE_Methyltransferase-like_protein_10_OS=Danio_rerio_GN=mettl10_PE=2_SV=1	Q5D013	84.78	methyltransferase like 10(mettl10)	Danio rerio
comp70670_c0_seq1	0.278049	-0.0803693	0.388455	-0.956979	-0.292426	RM28_XENLA_39S_ribosomal_protein_L28,_mitochondrial_OS=Xenopus_laevis_GN=mrpl28_PE=2_SV=1	Q68EV6	69.84	mitochondrial ribosomal protein L28 L homeolog(mrpl28.L)	Xenopus laevis
comp70670_c0_seq2	0.318506	-0.0567036	0.440573	-0.768724	-0.107337	RM28_XENLA_39S_ribosomal_protein_L28,_mitochondrial_OS=Xenopus_laevis_GN=mrpl28_PE=2_SV=1	Q68EV6	69.84	mitochondrial ribosomal protein L28 L homeolog(mrpl28.L)	Xenopus laevis
comp70692_c1_seq1	0.514994	0.226359	0.642739	-1.07493	-0.227586	KKCC1_HUMAN_Calcium/calmodulin-dependent_protein_kinase_kinase_1_OS=Homo_sapiens_GN=CAMKK1_PE=1_SV=2	Q8N5S9	64.97	calcium/calmodulin dependent protein kinase kinase 1(CAMKK1)	Homo sapiens
comp70743_c0_seq1	0.208389	-0.217633	0.368118	-0.683097	-0.195471	RBBP9_HUMAN_Putative_hydrolase_RBBP9_OS=Homo_sapiens_GN=RBBP9_PE=1_SV=2	O75884	70.45	RB binding protein 9, serine hydrolase(RBBP9)	Homo sapiens
comp70878_c0_seq2	0.186213	-0.164135	0.262976	-1.07897	-0.322588	LYPL1_PONAB_Lysophospholipase-like_protein_1_OS=Pongo_abelii_GN=LYPLAL1_PE=2_SV=3	Q5R8C2	62.83	lysophospholipase-like 1(LYPLAL1)	Pongo abelii
comp70878_c0_seq4	0.290645	-0.0599238	0.485376	-1.15258	-0.114817	LYPL1_PONAB_Lysophospholipase-like_protein_1_OS=Pongo_abelii_GN=LYPLAL1_PE=2_SV=3	Q5R8C2	62.83	lysophospholipase-like 1(LYPLAL1)	Pongo abelii
comp70921_c0_seq2	0.389693	-0.346214	0.467502	-0.392492	-0.0576741	TIFA_BOVIN_TRAF-interacting_protein_with_FHA_domain-containing_protein_A_OS=Bos_taurus_GN=TIFA_PE=2_SV=1	A2VDM0	37.5	TRAF interacting protein with forkhead associated domain(TIFA)	Bos taurus
comp70944_c1_seq1	0.42602	0.0782714	0.500836	-0.763501	-0.268957	MFTC_HUMAN_Mitochondrial_folate_transporter/carrier_OS=Homo_sapiens_GN=SLC25A32_PE=1_SV=2	Q9H2D1	70.57	solute carrier family 25 member 32(SLC25A32)	Homo sapiens
comp71084_c0_seq4	0.301521	-0.282241	0.364731	-0.866602	-0.082679	SCO2_DANRE_Protein_SCO2_homolog,_mitochondrial_OS=Danio_rerio_GN=sco2_PE=3_SV=1	Q5RH02	74.32	SCO2 cytochrome c oxidase assembly protein(sco2)	Danio rerio
comp71125_c0_seq2	0.463585	-0.262614	0.392141	-0.907639	-0.113337	RL32_RAT_60S_ribosomal_protein_L32_OS=Rattus_norvegicus_GN=Rpl32_PE=1_SV=2	P62912	93.2	ribosomal protein L32(Rpl32)	Rattus norvegicus
comp71159_c0_seq2	0.383999	-0.156863	0.493902	-0.772797	-0.0840174	MNF1_DANRE_Mitochondrial_nucleoid_factor_1_OS=Danio_rerio_GN=mnf1_PE=2_SV=1	Q6PBU7	93.8	ubiquinol-cytochrome c reductase complex assembly factor 2(uqcc2)	Danio rerio
comp71326_c0_seq1	0.40545	-0.164443	0.587817	-0.748316	-0.0313969	CBR1_RABIT_Carbonyl_reductase_[NADPH]_1_OS=Oryctolagus_cuniculus_GN=CBR1_PE=2_SV=2	P47844	60.73	carbonyl reductase 1(CBR1)	Oryctolagus cuniculus
comp71379_c0_seq1	0.402763	-0.465097	0.389113	-1.10217	-0.245368	RPAB5_MOUSE_DNA-directed_RNA_polymerases_I,_II,_and_III_subunit_RPABC5_OS=Mus_musculus_GN=Polr2l_PE=2_SV=1	P62876	100	polymerase (RNA) II (DNA directed) polypeptide L(Polr2l)	Mus musculus
comp71379_c0_seq2	0.406696	-0.0918137	0.33388	-1.08981	-0.105004	RPAB5_MOUSE_DNA-directed_RNA_polymerases_I,_II,_and_III_subunit_RPABC5_OS=Mus_musculus_GN=Polr2l_PE=2_SV=1	P62876	100	polymerase (RNA) II (DNA directed) polypeptide L(Polr2l)	Mus musculus
comp71455_c0_seq1	0.540077	-0.386562	0.403984	-1.96834	-0.0865262	TIM9_HUMAN_Mitochondrial_import_inner_membrane_translocase_subunit_Tim9_OS=Homo_sapiens_GN=TIMM9_PE=1_SV=1	Q9Y5J7	92.13	translocase of inner mitochondrial membrane 9(TIMM9)	Homo sapiens
comp71455_c0_seq2	0.37184	-0.111628	0.419541	-0.772435	-0.179985	TIM9_HUMAN_Mitochondrial_import_inner_membrane_translocase_subunit_Tim9_OS=Homo_sapiens_GN=TIMM9_PE=1_SV=1	Q9Y5J7	92.13	translocase of inner mitochondrial membrane 9(TIMM9)	Homo sapiens
comp71455_c0_seq3	0.313192	-0.72255	0.333748	-2.27932	-0.388639	TIM9_HUMAN_Mitochondrial_import_inner_membrane_translocase_subunit_Tim9_OS=Homo_sapiens_GN=TIMM9_PE=1_SV=1	Q9Y5J7	92.13	translocase of inner mitochondrial membrane 9(TIMM9)	Homo sapiens
comp71689_c0_seq1	0.428175	-0.0488702	0.427637	-0.654522	-0.0681931	INM02_DANRE_UPF0510_protein_INM02_OS=Danio_rerio_GN=zgc:171980_PE=2_SV=1	A7E2M3	94.06	ER membrane protein complex subunit 10(emc10)	Danio rerio
comp71689_c0_seq4	0.386479	-0.260337	0.23707	-0.836361	-0.369269	INM02_DANRE_UPF0510_protein_INM02_OS=Danio_rerio_GN=zgc:171980_PE=2_SV=1	A7E2M3	87.61	ER membrane protein complex subunit 10(emc10)	Danio rerio
comp71689_c0_seq5	0.508673	-0.0605696	0.49666	-0.852782	-0.0491575	INM02_DANRE_UPF0510_protein_INM02_OS=Danio_rerio_GN=zgc:171980_PE=2_SV=1	A7E2M3	87.61	ER membrane protein complex subunit 10(emc10)	Danio rerio
comp71689_c0_seq6	0.520564	-0.0391905	0.453867	-0.719585	-0.0275046	INM02_DANRE_UPF0510_protein_INM02_OS=Danio_rerio_GN=zgc:171980_PE=2_SV=1	A7E2M3	94.06	ER membrane protein complex subunit 10(emc10)	Danio rerio
comp71718_c1_seq1	0.530234	-0.295062	0.43641	-0.643766	-0.0136498	RBMX2_HUMAN_RNA-binding_motif_protein,_X-linked_2_OS=Homo_sapiens_GN=RBMX2_PE=1_SV=2	Q9Y388	83.1	RNA binding motif protein, X-linked 2(RBMX2)	Homo sapiens
comp71734_c0_seq1	0.437755	-0.240526	0.402936	-0.738602	-0.117288	NDUS6_MOUSE_NADH_dehydrogenase_[ubiquinone]_iron-sulfur_protein_6,_mitochondrial_OS=Mus_musculus_GN=Ndufs6_PE=1_SV=2	P52503	70.18	NADH dehydrogenase (ubiquinone) Fe-S protein 6(Ndufs6)	Mus musculus
comp71871_c0_seq2	0.265519	-0.430998	0.25911	-1.15262	-0.188304	QCR9_BOVIN_Cytochrome_b-c1_complex_subunit_9_OS=Bos_taurus_GN=UQCR10_PE=1_SV=3	P00130	66.1	ubiquinol-cytochrome c reductase, complex III subunit X(UQCR10)	Bos taurus
comp71953_c0_seq1	0.478105	-0.185449	0.419415	-0.967519	-0.121598	RS20_RAT_40S_ribosomal_protein_S20_OS=Rattus_norvegicus_GN=Rps20_PE=3_SV=1	P60868	97.48	ribosomal protein S20(Rps20)	Rattus norvegicus
comp71953_c0_seq2	0.553339	-0.31411	0.367735	-1.22279	-0.169726	RS20_RAT_40S_ribosomal_protein_S20_OS=Rattus_norvegicus_GN=Rps20_PE=3_SV=1	P60868	97.48	ribosomal protein S20(Rps20)	Rattus norvegicus
comp72059_c0_seq2	0.288941	0.0604358	0.571697	-1.03069	-0.277852	RM55_HUMAN_39S_ribosomal_protein_L55,_mitochondrial_OS=Homo_sapiens_GN=MRPL55_PE=1_SV=1	Q7Z7F7	55.93	mitochondrial ribosomal protein L55(MRPL55)	Homo sapiens
comp72121_c0_seq2	0.374911	-0.151331	0.255834	-0.626043	-0.122781	G6PC3_DANRE_Glucose-6-phosphatase_3_OS=Danio_rerio_GN=g6pc3_PE=2_SV=1	A1A5Z0	83.48	glucose 6 phosphatase, catalytic, 3(g6pc3)	Danio rerio
comp72135_c0_seq2	0.398743	-0.142239	0.450795	-0.134031	-0.119231	CREL2_DANRE_Cysteine-rich_with_EGF-like_domain_protein_2_OS=Danio_rerio_GN=creld2_PE=2_SV=2	Q7SXF6	73.67	cysteine-rich with EGF-like domains 2(creld2)	Danio rerio
comp72176_c0_seq1	0.30807	-0.13108	0.331601	-0.519159	-0.214014	NUP37_HUMAN_Nucleoporin_Nup37_OS=Homo_sapiens_GN=NUP37_PE=1_SV=1	Q8NFH4	68.4	nucleoporin 37(NUP37)	Homo sapiens
comp72256_c0_seq1	0.332505	-0.054571	0.534085	-0.601145	-0.0977109	NIPA1_MOUSE_Magnesium_transporter_NIPA1_OS=Mus_musculus_GN=Nipa1_PE=1_SV=1	Q8BHK1	63.93	non imprinted in Prader-Willi/Angelman syndrome 1 homolog (human)(Nipa1)	Mus musculus
comp72283_c0_seq1	0.377154	0.0697203	0.449634	-0.771131	-0.360972	NANP_RAT_N-acylneuraminate-9-phosphatase_OS=Rattus_norvegicus_GN=Nanp_PE=1_SV=1	Q5M969	51.07	N-acetylneuraminic acid phosphatase(Nanp)	Rattus norvegicus
comp72284_c0_seq1	0.611988	-0.255113	0.688846	-0.49952	0.105967	TEBP_PONAB_Prostaglandin_E_synthase_3_OS=Pongo_abelii_GN=PTGES3_PE=2_SV=1	Q5NVM4	80	prostaglandin E synthase 3(PTGES3)	Pongo abelii
comp72284_c0_seq2	0.43136	-0.13688	0.428341	-0.345187	-0.0014356	TEBP_PONAB_Prostaglandin_E_synthase_3_OS=Pongo_abelii_GN=PTGES3_PE=2_SV=1	Q5NVM4	79.23	prostaglandin E synthase 3(PTGES3)	Pongo abelii
comp72295_c0_seq1	0.391034	-0.39182	0.569891	-0.145855	-0.153706	C1TC_HUMAN_C-1-tetrahydrofolate_synthase,_cytoplasmic_OS=Homo_sapiens_GN=MTHFD1_PE=1_SV=3	P11586	76.63	methylenetetrahydrofolate dehydrogenase, cyclohydrolase and formyltetrahydrofolate synthetase 1(MTHFD1)	Homo sapiens
comp72298_c0_seq1	0.309347	-0.147372	0.378648	-0.866284	-0.136024	DENR_DANRE_Density-regulated_protein_OS=Danio_rerio_GN=denr_PE=1_SV=1	Q6DH65	97.53	density-regulated protein(denr)	Danio rerio
comp72301_c0_seq5	0.429552	-0.00884724	0.41227	-0.444601	-0.0173925	SARNP_MOUSE_SAP_domain-containing_ribonucleoprotein_OS=Mus_musculus_GN=Sarnp_PE=1_SV=3	Q9D1J3	57.77	SAP domain containing ribonucleoprotein(Sarnp)	Mus musculus
comp72415_c0_seq4	0.665126	-0.111032	0.488649	-0.343476	-0.0864401	DUS11_MOUSE_RNA/RNP_complex-1-interacting_phosphatase_OS=Mus_musculus_GN=Dusp11_PE=2_SV=1	Q6NXK5	59.18	dual specificity phosphatase 11 (RNA/RNP complex 1-interacting)(Dusp11)	Mus musculus
comp72415_c0_seq5	0.334137	-0.1237	0.39548	-0.269228	-0.0488283	DUS11_MOUSE_RNA/RNP_complex-1-interacting_phosphatase_OS=Mus_musculus_GN=Dusp11_PE=2_SV=1	Q6NXK5	59.18	dual specificity phosphatase 11 (RNA/RNP complex 1-interacting)(Dusp11)	Mus musculus
comp72428_c0_seq3	0.304489	0.111211	0.653018	-0.606943	-0.149919	RAD18_HUMAN_E3_ubiquitin-protein_ligase_RAD18_OS=Homo_sapiens_GN=RAD18_PE=1_SV=2	Q9NS91	43.37	RAD18, E3 ubiquitin protein ligase(RAD18)	Homo sapiens
comp72503_c0_seq4	0.336685	-0.402196	0.553723	-1.01651	-0.0921761	DLRB1_HUMAN_Dynein_light_chain_roadblock-type_1_OS=Homo_sapiens_GN=DYNLRB1_PE=1_SV=3	Q9NP97	73.56	dynein light chain roadblock-type 1(DYNLRB1)	Homo sapiens
comp72548_c0_seq1	0.546761	-0.113019	0.652799	-0.400185	0.0812931	IMPA1_BOVIN_Inositol_monophosphatase_1_OS=Bos_taurus_GN=IMPA1_PE=1_SV=1	P20456	66.91	inositol monophosphatase 1(IMPA1)	Bos taurus
comp72583_c0_seq1	0.511323	-0.805927	0.314535	-1.26292	-0.110537	SSRD_MOUSE_Translocon-associated_protein_subunit_delta_OS=Mus_musculus_GN=Ssr4_PE=2_SV=1	Q62186	75.34	signal sequence receptor, delta(Ssr4)	Mus musculus
comp72594_c0_seq8	0.528572	-0.164935	0.403614	-1.01378	-0.339976	CCL20_MOUSE_C-C_motif_chemokine_20_OS=Mus_musculus_GN=Ccl20_PE=1_SV=1	O89093	34.94	chemokine (C-C motif) ligand 20(Ccl20)	Mus musculus
comp72606_c1_seq2	0.226534	-0.0772853	0.38564	-0.699171	-0.356755	RT26_MOUSE_28S_ribosomal_protein_S26,_mitochondrial_OS=Mus_musculus_GN=Mrps26_PE=2_SV=1	Q80ZS3	51.23	mitochondrial ribosomal protein S26(Mrps26)	Mus musculus
comp72645_c0_seq1	0.380719	-0.172237	0.320684	-1.34321	-0.237381	TSTD1_HUMAN_Thiosulfate_sulfurtransferase/rhodanese-like_domain-containing_protein_1_OS=Homo_sapiens_GN=TSTD1_PE=1_SV=3	Q8NFU3	49.53	thiosulfate sulfurtransferase like domain containing 1(TSTD1)	Homo sapiens
comp72645_c0_seq2	0.290546	-0.230381	0.265333	-1.51087	-0.148325	TSTD1_HUMAN_Thiosulfate_sulfurtransferase/rhodanese-like_domain-containing_protein_1_OS=Homo_sapiens_GN=TSTD1_PE=1_SV=3	Q8NFU3	46.73	thiosulfate sulfurtransferase like domain containing 1(TSTD1)	Homo sapiens
comp72705_c0_seq1	0.408019	-0.0449316	0.402911	-0.276204	-0.117163	IPKG_PIG_cAMP-dependent_protein_kinase_inhibitor_gamma_OS=Sus_scrofa_GN=PKIG_PE=3_SV=1	Q7YQJ4	50.68	protein kinase (cAMP-dependent, catalytic) inhibitor gamma(PKIG)	Sus scrofa
comp72705_c0_seq2	0.318706	-0.0550677	0.323489	-0.341217	-0.0837253	IPKG_PIG_cAMP-dependent_protein_kinase_inhibitor_gamma_OS=Sus_scrofa_GN=PKIG_PE=3_SV=1	Q7YQJ4	50.68	protein kinase (cAMP-dependent, catalytic) inhibitor gamma(PKIG)	Sus scrofa
comp72788_c0_seq1	0.530281	0.0280468	0.427394	-0.428885	-0.105024	CK074_MOUSE_Uncharacterized_protein_C11orf74_homolog_OS=Mus_musculus_GN=Nwc_PE=2_SV=1	Q9CQI4	31.86	RIKEN cDNA B230118H07 gene(B230118H07Rik)	Mus musculus
comp72831_c0_seq1	0.305618	-0.132255	0.300071	-0.776694	-0.087841	PFD1_DANRE_Prefoldin_subunit_1_OS=Danio_rerio_GN=pfdn1_PE=2_SV=1	Q5D016	90.98	prefoldin subunit 1(pfdn1)	Danio rerio
comp72848_c0_seq1	0.275	-0.12031	0.318751	-1.21102	-0.236843	DYL1_DROME_Dynein_light_chain_1,_cytoplasmic_OS=Drosophila_melanogaster_GN=ctp_PE=1_SV=1	Q24117	96.63	cut up(ctp)	Drosophila melanogaster
comp72863_c0_seq2	0.430312	-0.0822686	0.382954	-0.446198	-0.122971	EXOS3_HUMAN_Exosome_complex_component_RRP40_OS=Homo_sapiens_GN=EXOSC3_PE=1_SV=3	Q9NQT5	62.45	exosome component 3(EXOSC3)	Homo sapiens
comp72916_c2_seq3	0.511568	-0.396404	0.5016	-0.422823	0.0460682	RHOA_RAT_Transforming_protein_RhoA_OS=Rattus_norvegicus_GN=Rhoa_PE=1_SV=1	P61589	98.32	ras homolog family member A(Rhoa)	Rattus norvegicus
comp72972_c0_seq6	0.596937	-0.279348	0.486365	-0.472069	-0.119837	DPOE3_MOUSE_DNA_polymerase_epsilon_subunit_3_OS=Mus_musculus_GN=Pole3_PE=2_SV=1	Q9JKP7	79.67	polymerase (DNA directed), epsilon 3 (p17 subunit)(Pole3)	Mus musculus
comp73024_c0_seq8	1.06682	-1.62696	0.69275	-0.768331	0.163718	CX6B1_TARSY_Cytochrome_c_oxidase_subunit_6B1_OS=Tarsius_syrichta_GN=COX6B1_PE=3_SV=3	Q7YRK6	66.04	cytochrome c oxidase subunit 6B1(COX6B)	UNKNOWN
comp73040_c0_seq3	0.169312	-0.185885	0.263509	-0.72233	-0.259452	RM34_MACFA_39S_ribosomal_protein_L34,_mitochondrial_OS=Macaca_fascicularis_GN=MRPL34_PE=3_SV=1	Q4R319	68.63	mitochondrial ribosomal protein L34(MRPL34)	Macaca fascicularis
comp73040_c0_seq4	0.321188	-0.196199	0.479708	-1.13712	-0.164345	RM34_MACFA_39S_ribosomal_protein_L34,_mitochondrial_OS=Macaca_fascicularis_GN=MRPL34_PE=3_SV=1	Q4R319	68.63	mitochondrial ribosomal protein L34(MRPL34)	Macaca fascicularis
comp73102_c0_seq3	0.765278	-0.46396	0.669696	-0.735358	0.0495388	PMVK_PIG_Phosphomevalonate_kinase_(Fragment)_OS=Sus_scrofa_GN=PMVK_PE=1_SV=3	Q29081	61.22	phosphomevalonate kinase(PMVK)	Sus scrofa
comp73134_c0_seq2	0.440056	-0.519657	0.496156	-0.455904	0.00475438	TCP4_CHICK_Activated_RNA_polymerase_II_transcriptional_coactivator_p15_OS=Gallus_gallus_GN=SUB1_PE=2_SV=1	Q5ZK63	76.38	SUB1 homolog (S. cerevisiae)(SUB1)	Gallus gallus
comp73199_c2_seq2	0.427128	-0.0521215	0.35312	-0.458185	-0.0491845	ZN706_MOUSE_Zinc_finger_protein_706_OS=Mus_musculus_GN=Znf706_PE=2_SV=1	Q9D115	84.44	zinc finger protein 706(Zfp706)	Mus musculus
comp73225_c0_seq1	0.471658	-0.08767	0.65204	-0.485953	-0.111716	TF2H5_CHICK_General_transcription_factor_IIH_subunit_5_OS=Gallus_gallus_GN=GTF2H5_PE=3_SV=1	Q5ZKH0	88.73	general transcription factor IIH subunit 5(GTF2H5)	Gallus gallus
comp73228_c0_seq1	0.306196	-0.298711	0.381276	-0.244926	-0.143027	TM206_DANRE_Transmembrane_protein_206_OS=Danio_rerio_GN=tmem206_PE=2_SV=1	Q7SY31	90.27	transmembrane protein 206(tmem206)	Danio rerio
comp73237_c0_seq3	0.326033	-0.0574948	0.509084	-0.39158	-0.0638798	F204A_MOUSE_Protein_FAM204A_OS=Mus_musculus_GN=Fam204a_PE=2_SV=1	Q8C6C7	41.25	family with sequence similarity 204, member A(Fam204a)	Mus musculus
comp73245_c0_seq1	0.0825574	-0.0748469	0.340629	-0.492482	-0.345716	MK67I_DANRE_MKI67_FHA_domain-interacting_nucleolar_phosphoprotein_OS=Danio_rerio_GN=mki67ip_PE=2_SV=2	Q8JIY8	85.66	nucleolar protein interacting with the FHA domain of MKI67(nifk)	Danio rerio
comp73245_c0_seq2	0.138319	-0.0386972	0.378461	-0.453388	-0.516335	MK67I_DANRE_MKI67_FHA_domain-interacting_nucleolar_phosphoprotein_OS=Danio_rerio_GN=mki67ip_PE=2_SV=2	Q8JIY8	85.66	nucleolar protein interacting with the FHA domain of MKI67(nifk)	Danio rerio
comp73260_c1_seq1	0.59925	-0.718518	0.605149	-0.474464	0.103468	MIER1_MOUSE_Mesoderm_induction_early_response_protein_1_OS=Mus_musculus_GN=Mier1_PE=1_SV=2	Q5UAK0	52	MEIR1 treanscription regulator(Mier1)	Mus musculus
comp73295_c0_seq3	0.351866	-0.223573	0.226478	-0.50098	-0.254187	CG057_HUMAN_Uncharacterized_protein_C7orf57_OS=Homo_sapiens_GN=C7orf57_PE=1_SV=3	Q8NEG2	28.44	chromosome 7 open reading frame 57(C7orf57)	Homo sapiens
comp73295_c0_seq5	0.455674	-0.143916	0.386362	-0.32064	-0.0286477	CG057_HUMAN_Uncharacterized_protein_C7orf57_OS=Homo_sapiens_GN=C7orf57_PE=1_SV=3	Q8NEG2	28.44	chromosome 7 open reading frame 57(C7orf57)	Homo sapiens
comp73301_c0_seq3	0.415101	-0.228614	0.325811	-1.01172	-0.0611099	RL22_ICTPU_60S_ribosomal_protein_L22_OS=Ictalurus_punctatus_GN=rpl22_PE=2_SV=3	Q90YU6	95.83	ribosomal protein L22(LOC100304536)	Ictalurus punctatus
comp73336_c0_seq2	0.532574	-0.153266	0.558829	-0.724009	-0.315561	NTF2_RAT_Nuclear_transport_factor_2_OS=Rattus_norvegicus_GN=Nutf2_PE=1_SV=1	P61972	74.8	nuclear transport factor 2(Nutf2)	Rattus norvegicus
comp73336_c0_seq3	0.639594	-0.113139	0.704258	-0.537004	-0.175364	NTF2_RAT_Nuclear_transport_factor_2_OS=Rattus_norvegicus_GN=Nutf2_PE=1_SV=1	P61972	74.8	nuclear transport factor 2(Nutf2)	Rattus norvegicus
comp73387_c0_seq1	0.467045	-0.0321515	0.418754	-0.455914	-0.159551	ENOA_ALLMI_Alpha-enolase_OS=Alligator_mississippiensis_PE=2_SV=3	Q9PVK2	90.72	enolase 1(ENO1)	Alligator mississippiensis
comp73414_c0_seq1	0.482801	-0.0857331	0.406859	-0.60715	-0.117565	ORN_BOVIN_Oligoribonuclease,_mitochondrial_OS=Bos_taurus_GN=REXO2_PE=2_SV=1	A2VE52	81.12	RNA exonuclease 2(REXO2)	Bos taurus
comp73414_c0_seq2	0.256302	-0.205731	0.430825	-0.809046	-0.187217	ORN_BOVIN_Oligoribonuclease,_mitochondrial_OS=Bos_taurus_GN=REXO2_PE=2_SV=1	A2VE52	81.54	RNA exonuclease 2(REXO2)	Bos taurus
comp73432_c1_seq6	0.210119	-0.152192	0.352859	-0.80486	-0.254941	LAS1L_MOUSE_Ribosomal_biogenesis_protein_LAS1L_OS=Mus_musculus_GN=Las1l_PE=2_SV=1	A2BE28	37.72	LAS1-like (S. cerevisiae)(Las1l)	Mus musculus
comp73454_c0_seq3	0.498458	-0.287773	0.468948	-1.23896	-0.0695361	CA212_DANRE_UPF0767_protein_C1orf212_homolog_OS=Danio_rerio_GN=si:ch73-31g16.1_PE=2_SV=1	Q5BKW8	90.11	small integral membrane protein 12(smim12)	Danio rerio
comp73488_c1_seq2	0.538554	-0.209539	0.440996	-0.408674	0.0370493	RET1_RAT_Retinol-binding_protein_1_OS=Rattus_norvegicus_GN=Rbp1_PE=1_SV=2	P02696	63.64	retinol binding protein 1(Rbp1)	Rattus norvegicus
comp73569_c0_seq1	0.591219	-0.118801	0.64804	-0.350721	0.0430129	GILT_BOVIN_Gamma-interferon-inducible_lysosomal_thiol_reductase_OS=Bos_taurus_GN=IFI30_PE=2_SV=1	A6QPN6	45.32	IFI30, lysosomal thiol reductase(IFI30)	Bos taurus
comp73569_c0_seq3	0.524283	-0.117151	0.683566	-0.326167	0.0409168	GILT_BOVIN_Gamma-interferon-inducible_lysosomal_thiol_reductase_OS=Bos_taurus_GN=IFI30_PE=2_SV=1	A6QPN6	45.32	IFI30, lysosomal thiol reductase(IFI30)	Bos taurus
comp73601_c2_seq1	0.367156	-0.11352	0.441018	-0.571354	-0.0242375	TPRKB_MOUSE_TP53RK-binding_protein_OS=Mus_musculus_GN=Tprkb_PE=2_SV=1	Q8QZZ7	56.9	Tp53rk binding protein(Tprkb)	Mus musculus
comp73697_c0_seq1	0.22972	-0.0245473	1.31655	-1.92583	-0.1765	RCL1_HUMAN_RNA_3'-terminal_phosphate_cyclase-like_protein_OS=Homo_sapiens_GN=RCL1_PE=1_SV=3	Q9Y2P8	71.13	RNA terminal phosphate cyclase like 1(RCL1)	Homo sapiens
comp73720_c1_seq1	0.600331	-0.119514	0.611527	-0.306185	-0.31073	CRY2_HUMAN_Cryptochrome-2_OS=Homo_sapiens_GN=CRY2_PE=1_SV=2	Q49AN0	58.62	cryptochrome circadian clock 2(CRY2)	Homo sapiens
comp73816_c2_seq1	0.423848	-0.164295	0.369923	0.00653744	-0.145929	RBM28_MOUSE_RNA-binding_protein_28_OS=Mus_musculus_GN=Rbm28_PE=1_SV=4	Q8CGC6	56.48	RNA binding motif protein 28(Rbm28)	Mus musculus
comp73818_c0_seq2	0.470052	-0.177118	0.39506	-0.547223	-0.0345246	RM03_MOUSE_39S_ribosomal_protein_L3,_mitochondrial_OS=Mus_musculus_GN=Mrpl3_PE=2_SV=1	Q99N95	67.11	mitochondrial ribosomal protein L3(Mrpl3)	Mus musculus
comp73828_c1_seq2	0.551387	-1.03014	0.535062	-1.43345	-0.0630298	OTUB1_RAT_Ubiquitin_thioesterase_OTUB1_OS=Rattus_norvegicus_GN=Otub1_PE=1_SV=1	B2RYG6	70.79	OTU deubiquitinase, ubiquitin aldehyde binding 1(Otub1)	Rattus norvegicus
comp73854_c0_seq1	0.167907	-0.0536397	0.346986	-0.427354	-0.274253	GPN1_BOVIN_GPN-loop_GTPase_1_OS=Bos_taurus_GN=GPN1_PE=2_SV=1	A4FUD1	78.61	GPN-loop GTPase 1(GPN1)	Bos taurus
comp73900_c0_seq2	0.307802	0.00710154	0.462164	-0.292797	-0.183455	CD123_DANRE_Cell_division_cycle_protein_123_homolog_OS=Danio_rerio_GN=cdc123_PE=2_SV=1	Q6PC40	92.1	cell division cycle 123 homolog (S. cerevisiae)(cdc123)	Danio rerio
comp73922_c0_seq2	0.562932	-0.120775	0.338235	-0.757861	-0.170807	LITAF_MOUSE_Lipopolysaccharide-induced_tumor_necrosis_factor-alpha_factor_homolog_OS=Mus_musculus_GN=Litaf_PE=1_SV=1	Q9JLJ0	43.69	LPS-induced TN factor(Litaf)	Mus musculus
comp73939_c0_seq1	0.471337	-0.0663608	0.460523	-0.415776	-0.0487979	RBM8A_DANRE_RNA-binding_protein_8A_OS=Danio_rerio_GN=rbm8a_PE=2_SV=1	Q5D018	98.01	RNA binding motif protein 8A(rbm8a)	Danio rerio
comp73959_c0_seq2	0.329319	-0.246766	0.181078	-0.985707	-0.414383	RM27_HUMAN_39S_ribosomal_protein_L27,_mitochondrial_OS=Homo_sapiens_GN=MRPL27_PE=1_SV=1	Q9P0M9	66.9	mitochondrial ribosomal protein L27(MRPL27)	Homo sapiens
comp74034_c0_seq6	0.219312	-0.112844	0.601008	-0.612143	-0.168962	AKIP_HUMAN_Aurora_kinase_A-interacting_protein_OS=Homo_sapiens_GN=AURKAIP1_PE=1_SV=1	Q9NWT8	47.76	aurora kinase A interacting protein 1(AURKAIP1)	Homo sapiens
comp74055_c0_seq1	0.623213	-0.138547	0.627051	-0.822037	-0.249038	ANM2_HUMAN_Protein_arginine_N-methyltransferase_2_OS=Homo_sapiens_GN=PRMT2_PE=1_SV=1	P55345	55.15	protein arginine methyltransferase 2(PRMT2)	Homo sapiens
comp74134_c0_seq3	0.568313	-0.139128	0.556512	-0.523071	0.0929432	PRS8_RAT_26S_protease_regulatory_subunit_8_OS=Rattus_norvegicus_GN=Psmc5_PE=1_SV=1	P62198	99.38	proteasome 26S subunit, ATPase 5(Psmc5)	Rattus norvegicus
comp74142_c0_seq3	0.205039	-0.318213	0.29619	-1.63024	-0.231656	TDX_ONCMY_Peroxiredoxin_OS=Oncorhynchus_mykiss_PE=2_SV=1	Q91191	87.36	natural killer cell enhancement factor(nkef)	Oncorhynchus mykiss
comp74171_c0_seq2	0.564936	-0.220009	0.637464	-0.435594	0.136394	OTUB1_RAT_Ubiquitin_thioesterase_OTUB1_OS=Rattus_norvegicus_GN=Otub1_PE=1_SV=1	B2RYG6	79.09	OTU deubiquitinase, ubiquitin aldehyde binding 1(Otub1)	Rattus norvegicus
comp74176_c0_seq3	0.3108	-0.0957422	0.340365	-0.43165	-0.279825	HAP28_RAT_28_kDa_heat-_and_acid-stable_phosphoprotein_OS=Rattus_norvegicus_GN=Pdap1_PE=1_SV=1	Q62785	79.22	PDGFA associated protein 1(Pdap1)	Rattus norvegicus
comp74270_c0_seq1	0.46624	-0.0655885	0.393353	-0.602499	-0.171672	RM54_DANRE_39S_ribosomal_protein_L54,_mitochondrial_OS=Danio_rerio_GN=mrpl54_PE=2_SV=2	Q1LXI5	77.94	mitochondrial ribosomal protein L54(mrpl54)	Danio rerio
comp74290_c0_seq1	0.426109	-0.0624889	0.393978	-0.587131	-0.349876	RRP15_DANRE_RRP15-like_protein_OS=Danio_rerio_GN=rrp15_PE=2_SV=1	Q7ZV20	64.48	ribosomal RNA processing 15 homolog(rrp15)	Danio rerio
comp74290_c0_seq3	0.390273	-0.0580934	0.45166	-0.484293	-0.282645	RRP15_DANRE_RRP15-like_protein_OS=Danio_rerio_GN=rrp15_PE=2_SV=1	Q7ZV20	67.69	ribosomal RNA processing 15 homolog(rrp15)	Danio rerio
comp74295_c2_seq2	0.546635	-0.249793	0.574625	-0.228714	-0.174986	CQ085_DANRE_Uncharacterized_protein_C17orf85_homolog_OS=Danio_rerio_GN=zgc:55870_PE=2_SV=1	Q803E1	91.36	nuclear cap binding subunit 3(ncbp3)	Danio rerio
comp74308_c0_seq2	0.325228	-0.0970642	0.324518	-0.755926	-0.102665	DHDDS_HUMAN_Dehydrodolichyl_diphosphate_synthase_OS=Homo_sapiens_GN=DHDDS_PE=1_SV=3	Q86SQ9	71.03	dehydrodolichyl diphosphate synthase subunit(DHDDS)	Homo sapiens
comp74314_c0_seq6	0.465877	-0.201529	0.450302	-0.284875	-0.0468095	PPIL4_MOUSE_Peptidyl-prolyl_cis-trans_isomerase-like_4_OS=Mus_musculus_GN=Ppil4_PE=2_SV=2	Q9CXG3	84.96	peptidylprolyl isomerase (cyclophilin)-like 4(Ppil4)	Mus musculus
comp74385_c0_seq5	0.354801	-0.010385	0.461959	-0.173236	-0.329057	GPTC4_XENLA_G_patch_domain-containing_protein_4_OS=Xenopus_laevis_GN=gpatch4_PE=2_SV=1	Q4V842	49.67	G-patch domain containing 4 L homeolog(gpatch4.L)	Xenopus laevis
comp74392_c0_seq1	0.382614	-0.116548	0.465149	-0.454556	-0.109623	EI2BA_RAT_Translation_initiation_factor_eIF-2B_subunit_alpha_OS=Rattus_norvegicus_GN=Eif2b1_PE=2_SV=1	Q64270	76.72	eukaryotic translation initiation factor 2B subunit 1 alpha(Eif2b1)	Rattus norvegicus
comp74435_c0_seq6	0.314444	-0.0513457	0.62644	-0.516774	-0.128313	SRP19_MOUSE_Signal_recognition_particle_19_kDa_protein_OS=Mus_musculus_GN=Srp19_PE=2_SV=1	Q9D7A6	78.57	signal recognition particle 19(Srp19)	Mus musculus
comp74449_c0_seq3	0.397809	-0.219961	0.485202	-0.46947	0.00915066	ANM3_HUMAN_Protein_arginine_N-methyltransferase_3_OS=Homo_sapiens_GN=PRMT3_PE=1_SV=3	O60678	61.55	protein arginine methyltransferase 3(PRMT3)	Homo sapiens
comp74589_c1_seq7	0.287762	-0.630158	0.599288	-0.194877	-0.130293	BACH_RAT_Cytosolic_acyl_coenzyme_A_thioester_hydrolase_OS=Rattus_norvegicus_GN=Acot7_PE=1_SV=4	Q64559	77.27	acyl-CoA thioesterase 7(Acot7)	Rattus norvegicus
comp74607_c1_seq1	0.433613	-0.138845	0.28264	-0.796971	-0.102009	RL7_CHICK_60S_ribosomal_protein_L7_OS=Gallus_gallus_GN=RPL7_PE=2_SV=1	Q5ZJ56	81.71	ribosomal protein L7(RPL7)	Gallus gallus
comp74636_c0_seq2	0.535737	-0.118432	0.578914	-0.792452	-0.153958	RSRC2_DANRE_Arginine/serine-rich_coiled-coil_protein_2_OS=Danio_rerio_GN=rsrc2_PE=2_SV=1	Q6NWI1	94.12	arginine/serine-rich coiled-coil 2(rsrc2)	Danio rerio
comp74636_c0_seq6	0.419216	-0.267678	0.333592	-0.419085	-0.398911	RSRC2_DANRE_Arginine/serine-rich_coiled-coil_protein_2_OS=Danio_rerio_GN=rsrc2_PE=2_SV=1	Q6NWI1	94.12	arginine/serine-rich coiled-coil 2(rsrc2)	Danio rerio
comp74658_c0_seq3	0.199308	-0.107427	0.340283	-0.552008	-0.273093	CP087_DANRE_UPF0547_protein_C16orf87_homolog_OS=Danio_rerio_GN=zgc:92818_PE=2_SV=1	Q6DGQ4	92.76	zgc:92818(zgc:92818)	Danio rerio
comp74665_c0_seq1	0.362	-0.0221863	0.457085	-0.404165	-0.290009	RM23_DANRE_39S_ribosomal_protein_L23,_mitochondrial_OS=Danio_rerio_GN=mrpl23_PE=2_SV=1	Q6IQS9	90.85	mitochondrial ribosomal protein L23(mrpl23)	Danio rerio
comp74665_c0_seq2	0.343821	-0.0224845	0.423502	-0.44975	-0.318978	RM23_DANRE_39S_ribosomal_protein_L23,_mitochondrial_OS=Danio_rerio_GN=mrpl23_PE=2_SV=1	Q6IQS9	90.85	mitochondrial ribosomal protein L23(mrpl23)	Danio rerio
comp74714_c0_seq2	1.71452	-0.822647	0.317037	-0.0498104	-0.136996	HXA4A_DANRE_Homeobox_protein_Hox-A4a_OS=Danio_rerio_GN=hoxa4a_PE=2_SV=2	Q9PWL5	93.88	homeobox A4a(hoxa4a)	Danio rerio
comp74718_c0_seq4	0.390591	-0.146048	0.423829	-0.268466	-0.0254949	WDR46_HUMAN_WD_repeat-containing_protein_46_OS=Homo_sapiens_GN=WDR46_PE=1_SV=3	O15213	55.18	WD repeat domain 46(WDR46)	Homo sapiens
comp74750_c0_seq1	0.212498	-0.114287	0.286374	-0.615083	-0.357835	AATF_RAT_Protein_AATF_OS=Rattus_norvegicus_GN=Aatf_PE=1_SV=1	Q9QYW0	66.33	apoptosis antagonizing transcription factor(Aatf)	Rattus norvegicus
comp74763_c0_seq5	0.249878	-0.214406	0.274923	-0.410626	-0.23449	B3GA3_MOUSE_Galactosylgalactosylxylosylprotein_3-beta-glucuronosyltransferase_3_OS=Mus_musculus_GN=B3gat3_PE=2_SV=1	P58158	59.05	beta-1,3-glucuronyltransferase 3 (glucuronosyltransferase I)(B3gat3)	Mus musculus
comp74805_c0_seq1	0.609015	-0.0920057	0.591606	-0.235925	-0.0122884	KRI1_DANRE_Protein_KRI1_homolog_OS=Danio_rerio_GN=kri1_PE=2_SV=1	Q6DRJ4	80.13	KRI1 homolog(kri1)	Danio rerio
comp74872_c0_seq3	0.254964	-0.0579891	0.366241	-0.588474	-0.168086	PSMD8_PONAB_26S_proteasome_non-ATPase_regulatory_subunit_8_(Fragment)_OS=Pongo_abelii_GN=PSMD8_PE=2_SV=2	Q5RE15	81.34	proteasome 26S subunit, non-ATPase 8(PSMD8)	Pongo abelii
comp74881_c0_seq1	0.428326	-0.0843859	0.424116	-0.0411431	-0.0429853	HME1_CHICK_Homeobox_protein_engrailed-1_OS=Gallus_gallus_GN=EN1_PE=3_SV=1	Q05916	62.22	engrailed homeobox 1(EN1)	Gallus gallus
comp74933_c0_seq1	0.927005	-0.476751	0.643184	-0.443461	-0.271603	A9A1B_DANRE_Aldehyde_dehydrogenase_family_9_member_A1-B_OS=Danio_rerio_GN=aldh9a1b_PE=2_SV=2	Q802W2	77.27	aldehyde dehydrogenase 9 family, member A1b(aldh9a1b)	Danio rerio
comp74965_c0_seq1	0.410101	-0.228865	0.341446	-0.353366	-0.049668	TAF9_MOUSE_Transcription_initiation_factor_TFIID_subunit_9_OS=Mus_musculus_GN=Taf9_PE=2_SV=1	Q8VI33	81.53	TATA-box binding protein associated factor 9(Taf9)	Mus musculus
comp74976_c0_seq10	0.154129	-0.647426	0.223302	0.298568	-0.257979	CO6A3_HUMAN_Collagen_alpha-3(VI)_chain_OS=Homo_sapiens_GN=COL6A3_PE=1_SV=5	P12111	60.56	collagen type VI alpha 3 chain(COL6A3)	Homo sapiens
comp74976_c0_seq21	0.485764	-0.540957	0.476067	-0.0917282	-0.209128	CO6A3_HUMAN_Collagen_alpha-3(VI)_chain_OS=Homo_sapiens_GN=COL6A3_PE=1_SV=5	P12111	60.56	collagen type VI alpha 3 chain(COL6A3)	Homo sapiens
comp74984_c0_seq1	0.311252	-0.139425	0.535548	-0.638162	-0.181598	CCD51_BOVIN_Coiled-coil_domain-containing_protein_51_OS=Bos_taurus_GN=CCDC51_PE=2_SV=1	Q5E9Q3	47.72	coiled-coil domain containing 51(CCDC51)	Bos taurus
comp75079_c0_seq1	0.664925	-0.220247	0.508391	-0.80165	-0.0865897	IMDH2_DANRE_Inosine-5'-monophosphate_dehydrogenase_2_OS=Danio_rerio_GN=impdh2_PE=3_SV=1	B0UXP9	98.44	IMP (inosine 5'-monophosphate) dehydrogenase 2(impdh2)	Danio rerio
comp75079_c0_seq2	0.778655	-0.126789	0.645009	-0.351411	-0.0203156	IMDH2_DANRE_Inosine-5'-monophosphate_dehydrogenase_2_OS=Danio_rerio_GN=impdh2_PE=3_SV=1	B0UXP9	98.44	IMP (inosine 5'-monophosphate) dehydrogenase 2(impdh2)	Danio rerio
comp75079_c0_seq6	0.296573	-0.0648096	0.481757	-0.565226	-0.10245	IMDH2_DANRE_Inosine-5'-monophosphate_dehydrogenase_2_OS=Danio_rerio_GN=impdh2_PE=3_SV=1	B0UXP9	98.44	IMP (inosine 5'-monophosphate) dehydrogenase 2(impdh2)	Danio rerio
comp75114_c0_seq4	0.460959	-0.138056	0.427526	-0.419909	-0.00982602	ERLEC_MOUSE_Endoplasmic_reticulum_lectin_1_OS=Mus_musculus_GN=Erlec1_PE=2_SV=1	Q8VEH8	66.84	endoplasmic reticulum lectin 1(Erlec1)	Mus musculus
comp75114_c0_seq8	0.306097	-0.0389144	0.357184	-0.362752	-0.0731519	ERLEC_MOUSE_Endoplasmic_reticulum_lectin_1_OS=Mus_musculus_GN=Erlec1_PE=2_SV=1	Q8VEH8	66.81	endoplasmic reticulum lectin 1(Erlec1)	Mus musculus
comp75169_c0_seq2	0.462743	-0.385607	0.592259	-0.420892	0.0431023	TM119_MOUSE_Transmembrane_protein_119_OS=Mus_musculus_GN=Tmem119_PE=2_SV=1	Q8R138	30.8	transmembrane protein 119(Tmem119)	Mus musculus
comp75180_c0_seq8	0.584557	-0.277897	0.56822	-0.516853	0.12444	SSBP_RABIT_Single-stranded_DNA-binding_protein,_mitochondrial_OS=Oryctolagus_cuniculus_GN=SSBP1_PE=2_SV=1	Q95KK4	77.55	single stranded DNA binding protein 1(SSBP1)	Oryctolagus cuniculus
comp75208_c0_seq2	0.292126	-0.0305602	0.490489	-0.225572	-0.0990756	TMCO1_RAT_Transmembrane_and_coiled-coil_domains_protein_1_OS=Rattus_norvegicus_GN=Tmco1_PE=2_SV=1	Q5I0H4	94.68	transmembrane and coiled-coil domains 1(Tmco1)	Rattus norvegicus
comp75225_c0_seq1	0.773114	-0.652746	0.416104	-0.244357	-0.26479	KT3K_HUMAN_Ketosamine-3-kinase_OS=Homo_sapiens_GN=FN3KRP_PE=1_SV=2	Q9HA64	75.16	fructosamine 3 kinase related protein(FN3KRP)	Homo sapiens
comp75229_c1_seq11	0.431155	-0.743744	0.222241	0.0878952	-0.396308	ZN879_MOUSE_Zinc_finger_protein_879_OS=Mus_musculus_GN=Znf879_PE=2_SV=1	Q8BI99	49.8	zinc finger protein 879(Zfp879)	Mus musculus
comp75241_c0_seq2	0.397232	-0.0381066	0.424296	-0.565778	-0.296036	PCNA_DANRE_Proliferating_cell_nuclear_antigen_OS=Danio_rerio_GN=pcna_PE=1_SV=2	Q9PTP1	98.85	proliferating cell nuclear antigen(pcna)	Danio rerio
comp75313_c0_seq9	0.41702	-0.0137453	0.389129	-0.44273	-0.0177679	NASP_RABIT_Nuclear_autoantigenic_sperm_protein_(Fragment)_OS=Oryctolagus_cuniculus_GN=NASP_PE=2_SV=2	P27123	52.24	nuclear autoantigenic sperm protein(NASP)	Oryctolagus cuniculus
comp75315_c0_seq3	0.502916	-0.116494	0.326972	-0.658187	-0.0632569	EIF3G_DANRE_Eukaryotic_translation_initiation_factor_3_subunit_G_OS=Danio_rerio_GN=eif3g_PE=1_SV=1	Q6DRC4	98.63	eukaryotic translation initiation factor 3, subunit G(eif3g)	Danio rerio
comp75323_c0_seq1	0.465669	-0.193002	0.545808	-0.387503	0.031703	ECHM_MOUSE_Enoyl-CoA_hydratase,_mitochondrial_OS=Mus_musculus_GN=Echs1_PE=1_SV=1	Q8BH95	75.56	enoyl Coenzyme A hydratase, short chain, 1, mitochondrial(Echs1)	Mus musculus
comp75348_c0_seq13	0.449521	-0.376258	0.512809	-0.136575	-0.0323951	SMRD1_MOUSE_SWI/SNF-related_matrix-associated_actin-dependent_regulator_of_chromatin_subfamily_D_member_1_OS=Mus_musculus_GN=Smarcd1_PE=1_SV=3	Q61466	96.79	SWI/SNF related, matrix associated, actin dependent regulator of chromatin, subfamily d, member 1(Smarcd1)	Mus musculus
comp75374_c0_seq1	0.389942	-0.125743	0.418982	-0.215239	0.0082566	FKBP7_PONAB_Peptidyl-prolyl_cis-trans_isomerase_FKBP7_OS=Pongo_abelii_GN=FKBP7_PE=2_SV=1	Q5RET2	60.2	FK506 binding protein 7(FKBP7)	Pongo abelii
comp75389_c0_seq1	0.348111	-0.0433102	0.340635	-0.246372	-0.0497452	KIN17_MOUSE_DNA/RNA-binding_protein_KIN17_OS=Mus_musculus_GN=Kin_PE=2_SV=1	Q8K339	74.74	Kin17 DNA and RNA binding protein(Kin)	Mus musculus
comp75452_c0_seq2	0.568575	-0.0143633	0.634247	-0.249476	-0.180482	MSXC_DANRE_Homeobox_protein_MSH-C_OS=Danio_rerio_GN=msxc_PE=2_SV=1	Q01703	95.62	muscle segment homeobox 3(msx3)	Danio rerio
comp75458_c0_seq3	0.357036	-0.300082	0.350794	-1.2757	-0.0713697	PHF5A_RAT_PHD_finger-like_domain-containing_protein_5A_OS=Rattus_norvegicus_GN=Phf5a_PE=2_SV=1	P83871	100	PHD finger protein 5A(Phf5a)	Rattus norvegicus
comp75511_c0_seq2	0.151988	0.0822781	0.549462	-0.875595	-0.30811	CHK2_HUMAN_Serine/threonine-protein_kinase_Chk2_OS=Homo_sapiens_GN=CHEK2_PE=1_SV=1	O96017	53.96	checkpoint kinase 2(CHEK2)	Homo sapiens
comp75555_c0_seq1	0.454288	-0.131002	0.594638	-1.02121	-0.041921	C560_HUMAN_Succinate_dehydrogenase_cytochrome_b560_subunit,_mitochondrial_OS=Homo_sapiens_GN=SDHC_PE=1_SV=1	Q99643	58.33	succinate dehydrogenase complex subunit C(SDHC)	Homo sapiens
comp75560_c0_seq2	0.349176	-0.224501	0.214065	-0.476019	-0.178046	BSCL2_HUMAN_Seipin_OS=Homo_sapiens_GN=BSCL2_PE=1_SV=3	Q96G97	50	BSCL2, seipin lipid droplet biogenesis associated(BSCL2)	Homo sapiens
comp75564_c0_seq2	0.313754	-0.268215	0.359076	-0.98184	-0.0966333	ELOF1_MOUSE_Transcription_elongation_factor_1_homolog_OS=Mus_musculus_GN=Elof1_PE=1_SV=1	P60003	92.65	ELF1 homolog, elongation factor 1(Elof1)	Mus musculus
comp75570_c0_seq1	0.443114	0.0910025	0.658411	-1.06608	-0.0485212	NFS1_PONAB_Cysteine_desulfurase,_mitochondrial_OS=Pongo_abelii_GN=NFS1_PE=2_SV=1	Q5RDE7	87.62	NFS1, cysteine desulfurase(NFS1)	Pongo abelii
comp75621_c0_seq5	0.255462	0.0779076	0.566045	-0.850156	-0.59632	CT072_MOUSE_Uncharacterized_protein_C20orf72_homolog_OS=Mus_musculus_PE=2_SV=1	Q9CXC3	52.71	mitochondrial genome maintainance exonuclease 1(Mgme1)	Mus musculus
comp75628_c0_seq1	0.529933	-0.0212264	0.562752	-0.21165	-0.259682	U3IP2_HUMAN_U3_small_nucleolar_RNA-interacting_protein_2_OS=Homo_sapiens_GN=RRP9_PE=1_SV=1	O43818	60.66	ribosomal RNA processing 9, small subunit (SSU) processome component, homolog (yeast)(RRP9)	Homo sapiens
comp75649_c4_seq3	0.47351	-0.0534606	0.36084	-0.52832	-0.0392351	UB2D4_HUMAN_Ubiquitin-conjugating_enzyme_E2_D4_OS=Homo_sapiens_GN=UBE2D4_PE=1_SV=1	Q9Y2X8	94.64	ubiquitin conjugating enzyme E2 D4 (putative)(UBE2D4)	Homo sapiens
comp75665_c3_seq22	0.383324	-0.0889344	0.457136	-0.648908	-0.109088	T120B_DANRE_Transmembrane_protein_120B_OS=Danio_rerio_GN=tmem120b_PE=2_SV=1	Q1LY80	92.11	transmembrane protein 120B(tmem120b)	Danio rerio
comp75667_c0_seq2	0.396578	-0.102475	0.383443	-0.202267	-0.0543338	CD2B2_HUMAN_CD2_antigen_cytoplasmic_tail-binding_protein_2_OS=Homo_sapiens_GN=CD2BP2_PE=1_SV=1	O95400	42.65	CD2 cytoplasmic tail binding protein 2(CD2BP2)	Homo sapiens
comp75667_c0_seq5	0.624282	-0.560083	0.744303	-0.218692	-0.268939	CD2B2_HUMAN_CD2_antigen_cytoplasmic_tail-binding_protein_2_OS=Homo_sapiens_GN=CD2BP2_PE=1_SV=1	O95400	45.27	CD2 cytoplasmic tail binding protein 2(CD2BP2)	Homo sapiens
comp75677_c0_seq1	0.300184	-0.0144587	0.403565	-0.578002	-0.278221	IPYR_MACFA_Inorganic_pyrophosphatase_OS=Macaca_fascicularis_GN=PPA1_PE=2_SV=2	Q4R543	73.79	pyrophosphatase (inorganic) 1(PPA1)	Macaca fascicularis
comp75710_c4_seq2	0.649693	-0.447345	0.78677	-0.712197	0.0152327	IF4A1_PANTR_Eukaryotic_initiation_factor_4A-I_OS=Pan_troglodytes_GN=EIF4A1_PE=2_SV=1	A5A6N4	86.96	eukaryotic translation initiation factor 4A1(EIF4A1)	Pan troglodytes
comp75710_c4_seq3	0.650463	-0.207625	0.85229	-0.546548	0.0640999	IF4A1_PANTR_Eukaryotic_initiation_factor_4A-I_OS=Pan_troglodytes_GN=EIF4A1_PE=2_SV=1	A5A6N4	86.96	eukaryotic translation initiation factor 4A1(EIF4A1)	Pan troglodytes
comp75712_c2_seq4	0.62938	-0.0580667	0.442584	-0.152466	-0.234912	DERM_MOUSE_Dermatopontin_OS=Mus_musculus_GN=Dpt_PE=2_SV=1	Q9QZZ6	59.9	dermatopontin(Dpt)	Mus musculus
comp75718_c4_seq1	0.444519	-0.381618	0.566556	-1.09566	-0.0835431	UBIM_PONAB_Ubiquitin-like_protein_FUBI_OS=Pongo_abelii_GN=FAU_PE=3_SV=1	P0C2F1	55.41	FAU, ubiquitin like and ribosomal protein S30 fusion(FAU)	Pongo abelii
comp75801_c0_seq5	0.512573	-0.149371	0.413841	-0.548928	-0.0372225	PPIB_BOVIN_Peptidyl-prolyl_cis-trans_isomerase_B_OS=Bos_taurus_GN=PPIB_PE=1_SV=4	P80311	83.33	peptidylprolyl isomerase B(PPIB)	Bos taurus
comp75802_c0_seq4	0.427421	-0.151973	0.369006	-0.702983	-0.170937	EF1D_XENLA_Elongation_factor_1-delta_OS=Xenopus_laevis_GN=eef1d_PE=1_SV=1	P29693	59.77	eukaryotic translation elongation factor 1 delta (guanine nucleotide exchange protein) L homeolog(eef1d.L)	Xenopus laevis
comp75802_c0_seq9	0.519628	-0.545628	0.449187	-1.5423	-0.146461	EF1D_MOUSE_Elongation_factor_1-delta_OS=Mus_musculus_GN=Eef1d_PE=1_SV=3	P57776	65.57	eukaryotic translation elongation factor 1 delta (guanine nucleotide exchange protein)(Eef1d)	Mus musculus
comp75823_c0_seq3	0.383492	-0.0996726	0.338723	-0.315976	-0.099336	RIOK2_HUMAN_Serine/threonine-protein_kinase_RIO2_OS=Homo_sapiens_GN=RIOK2_PE=1_SV=2	Q9BVS4	44.68	RIO kinase 2(RIOK2)	Homo sapiens
comp75837_c0_seq2	0.640509	-0.0517251	0.721623	-0.309681	-0.0378962	ACOX3_HUMAN_Peroxisomal_acyl-coenzyme_A_oxidase_3_OS=Homo_sapiens_GN=ACOX3_PE=1_SV=2	O15254	65	acyl-CoA oxidase 3, pristanoyl(ACOX3)	Homo sapiens
comp75850_c0_seq1	0.36885	-0.170591	0.290778	-0.292568	-0.18766	NEMO_RAT_NF-kappa-B_essential_modulator_OS=Rattus_norvegicus_GN=Ikbkg_PE=2_SV=1	Q6TMG5	47.4	inhibitor of kappa light polypeptide gene enhancer in B-cells, kinase gamma(Ikbkg)	Rattus norvegicus
comp75850_c0_seq3	0.521689	-0.337974	0.509008	-0.083457	-0.0529168	NEMO_RAT_NF-kappa-B_essential_modulator_OS=Rattus_norvegicus_GN=Ikbkg_PE=2_SV=1	Q6TMG5	46.48	inhibitor of kappa light polypeptide gene enhancer in B-cells, kinase gamma(Ikbkg)	Rattus norvegicus
comp75850_c0_seq6	0.493052	-0.109982	0.487033	-0.117277	0.0609449	NEMO_RAT_NF-kappa-B_essential_modulator_OS=Rattus_norvegicus_GN=Ikbkg_PE=2_SV=1	Q6TMG5	46.48	inhibitor of kappa light polypeptide gene enhancer in B-cells, kinase gamma(Ikbkg)	Rattus norvegicus
comp75854_c1_seq6	0.615689	-0.0365334	0.692359	-0.417155	0.0397533	HMGB2_CHICK_High_mobility_group_protein_B2_OS=Gallus_gallus_GN=HMGB2_PE=2_SV=2	P26584	72.16	high mobility group box 2(HMGB2)	Gallus gallus
comp75911_c0_seq3	0.361849	-0.0984484	0.368983	-0.647594	-0.101321	TRADD_DANRE_Tumor_necrosis_factor_receptor_type_1-associated_DEATH_domain_protein_OS=Danio_rerio_GN=tradd_PE=2_SV=1	Q9I9N5	89.76	tnfrsf1a-associated via death domain(tradd)	Danio rerio
comp75932_c0_seq2	0.500266	-0.262956	0.517187	-0.729708	-0.0297046	APC4_MOUSE_Anaphase-promoting_complex_subunit_4_OS=Mus_musculus_GN=Anapc4_PE=2_SV=1	Q91W96	42.33	anaphase promoting complex subunit 4(Anapc4)	Mus musculus
comp76017_c1_seq2	0.163417	-0.107294	0.282514	-0.932268	-0.221892	PSB3_ONCMY_Proteasome_subunit_beta_type-3_OS=Oncorhynchus_mykiss_GN=psmb3_PE=2_SV=1	O73817	96.59	proteasome subunit C10-11(LOC100135869)	Oncorhynchus mykiss
comp76027_c1_seq1	0.366598	-0.139792	0.400143	-0.607456	-0.126899	LACE1_HUMAN_Lactation_elevated_protein_1_OS=Homo_sapiens_GN=LACE1_PE=2_SV=2	Q8WV93	69.68	lactation elevated 1(LACE1)	Homo sapiens
comp76037_c0_seq2	0.542371	-0.33915	0.49578	-0.568375	-0.0354071	FBXW4_HUMAN_F-box/WD_repeat-containing_protein_4_OS=Homo_sapiens_GN=FBXW4_PE=2_SV=1	P57775	40.46	F-box and WD repeat domain containing 4(FBXW4)	Homo sapiens
comp76050_c2_seq3	0.333859	-0.203932	0.498272	-1.01424	-0.130381	TMM70_CHICK_Transmembrane_protein_70,_mitochondrial_OS=Gallus_gallus_GN=TMEM70_PE=2_SV=1	Q5ZLJ4	65.24	transmembrane protein 70(TMEM70)	Gallus gallus
comp76096_c0_seq3	0.288286	-0.0746282	0.347055	-0.492448	-0.204776	ELMD2_MOUSE_ELMO_domain-containing_protein_2_OS=Mus_musculus_GN=Elmod2_PE=2_SV=1	Q8BGF6	61.81	ELMO/CED-12 domain containing 2(Elmod2)	Mus musculus
comp76153_c0_seq2	0.56479	-0.110152	0.553886	-0.179492	0.00194454	DNJC3_HUMAN_DnaJ_homolog_subfamily_C_member_3_OS=Homo_sapiens_GN=DNAJC3_PE=1_SV=1	Q13217	72.61	DnaJ heat shock protein family (Hsp40) member C3(DNAJC3)	Homo sapiens
comp76173_c0_seq1	0.344118	-0.0605791	0.410012	-0.627289	-0.0828876	GPN3_DANRE_GPN-loop_GTPase_3_OS=Danio_rerio_GN=gpn3_PE=2_SV=2	Q6ZM63	94.04	GPN-loop GTPase 3(gpn3)	Danio rerio
comp76204_c1_seq1	0.647614	-0.271768	0.886786	-0.26958	-0.24537	ZNF35_HUMAN_Zinc_finger_protein_35_OS=Homo_sapiens_GN=ZNF35_PE=2_SV=4	P13682	38.64	zinc finger protein 35(ZNF35)	Homo sapiens
comp76207_c0_seq2	0.540786	-0.253585	0.368452	-0.665462	-0.146614	SGOL1_XENLA_Shugoshin-like_1_OS=Xenopus_laevis_GN=sgol1_PE=1_SV=1	Q4KLP8	49.02	shugoshin-like 1 L homeolog(sgol1.L)	Xenopus laevis
comp76243_c0_seq5	0.47469	-0.218967	0.570009	-0.689087	-0.0542726	CX6B1_HUMAN_Cytochrome_c_oxidase_subunit_6B1_OS=Homo_sapiens_GN=COX6B1_PE=1_SV=2	P14854	69.77	cytochrome c oxidase subunit 6B1(COX6B1)	Homo sapiens
comp76262_c2_seq4	0.293164	-0.342852	0.190623	-0.784238	-0.196115	TPPC3_CHICK_Trafficking_protein_particle_complex_subunit_3_OS=Gallus_gallus_GN=TRAPPC3_PE=2_SV=1	Q5ZI57	91.36	trafficking protein particle complex 3(TRAPPC3)	Gallus gallus
comp76310_c0_seq4	0.170382	-0.102551	0.363537	-1.13283	-0.377522	RRP36_HUMAN_Ribosomal_RNA_processing_protein_36_homolog_OS=Homo_sapiens_GN=RRP36_PE=1_SV=1	Q96EU6	57.67	ribosomal RNA processing 36(RRP36)	Homo sapiens
comp76431_c1_seq2	0.434092	-0.170211	0.377405	-0.415138	-0.0487746	ROGDI_DANRE_Protein_rogdi_homolog_OS=Danio_rerio_GN=rogdi_PE=2_SV=1	Q7ZVT5	95.65	rogdi homolog (Drosophila)(rogdi)	Danio rerio
comp76436_c0_seq2	0.455647	-0.00535599	0.430247	-0.297716	-0.287312	CI041_MOUSE_UPF0586_protein_C9orf41_homolog_OS=Mus_musculus_PE=2_SV=1	Q80UY1	74.52	carnosine N-methyltransferase 1(Carnmt1)	Mus musculus
comp76452_c0_seq1	0.276778	-0.00736999	0.385412	-0.337497	-0.123662	MMAA_HUMAN_Methylmalonic_aciduria_type_A_protein,_mitochondrial_OS=Homo_sapiens_GN=MMAA_PE=1_SV=1	Q8IVH4	73.45	methylmalonic aciduria (cobalamin deficiency) cblA type(MMAA)	Homo sapiens
comp76458_c0_seq25	0.321634	-0.0124213	0.532759	-0.458684	-0.174344	THEM4_XENLA_Thioesterase_superfamily_member_4_OS=Xenopus_laevis_GN=them4_PE=2_SV=2	Q6GLK2	58.41	thioesterase superfamily member 4 L homeolog(them4.L)	Xenopus laevis
comp76476_c0_seq4	0.649808	-0.251892	0.679663	-0.329421	0.0832291	SYHC_TAKRU_Histidine--tRNA_ligase,_cytoplasmic_OS=Takifugu_rubripes_GN=hars_PE=3_SV=1	P70076	82.56	histidyl-tRNA synthetase(hars)	Takifugu rubripes
comp76557_c0_seq31	0.277281	-0.276834	0.370627	-0.0772293	-0.2267	TRI25_MOUSE_E3_ubiquitin/ISG15_ligase_TRIM25_OS=Mus_musculus_GN=Trim25_PE=2_SV=2	Q61510	28.52	tripartite motif-containing 25(Trim25)	Mus musculus
comp76592_c0_seq12	0.419419	-0.338308	0.476304	-0.55243	-0.107258	TPTE2_HUMAN_Phosphatidylinositol_3,4,5-trisphosphate_3-phosphatase_TPTE2_OS=Homo_sapiens_GN=TPTE2_PE=1_SV=2	Q6XPS3	57.14	transmembrane phosphoinositide 3-phosphatase and tensin homolog 2(TPTE2)	Homo sapiens
comp76592_c0_seq16	0.37973	-0.256351	0.361698	-0.483633	-0.153996	TPTE2_HUMAN_Phosphatidylinositol_3,4,5-trisphosphate_3-phosphatase_TPTE2_OS=Homo_sapiens_GN=TPTE2_PE=1_SV=2	Q6XPS3	53.15	transmembrane phosphoinositide 3-phosphatase and tensin homolog 2(TPTE2)	Homo sapiens
comp76592_c0_seq17	0.415419	-0.244177	0.51005	-0.558961	-0.0339341	TPTE2_MACFA_Phosphatidylinositol_3,4,5-trisphosphate_3-phosphatase_TPTE2_OS=Macaca_fascicularis_GN=TPTE2_PE=2_SV=1	Q4R6N0	51.36	transmembrane phosphoinositide 3-phosphatase and tensin homolog 2(TPTE2)	Macaca fascicularis
comp76592_c0_seq18	0.567054	-0.189788	0.442779	-0.353496	-0.0937417	TPTE2_HUMAN_Phosphatidylinositol_3,4,5-trisphosphate_3-phosphatase_TPTE2_OS=Homo_sapiens_GN=TPTE2_PE=1_SV=2	Q6XPS3	57.14	transmembrane phosphoinositide 3-phosphatase and tensin homolog 2(TPTE2)	Homo sapiens
comp76592_c0_seq20	0.509517	-0.137755	0.634449	-0.344088	0.0211617	TPTE2_HUMAN_Phosphatidylinositol_3,4,5-trisphosphate_3-phosphatase_TPTE2_OS=Homo_sapiens_GN=TPTE2_PE=1_SV=2	Q6XPS3	53.15	transmembrane phosphoinositide 3-phosphatase and tensin homolog 2(TPTE2)	Homo sapiens
comp76592_c0_seq25	0.555588	-0.176952	0.607806	-0.360871	-0.0264521	TPTE2_HUMAN_Phosphatidylinositol_3,4,5-trisphosphate_3-phosphatase_TPTE2_OS=Homo_sapiens_GN=TPTE2_PE=1_SV=2	Q6XPS3	57.14	transmembrane phosphoinositide 3-phosphatase and tensin homolog 2(TPTE2)	Homo sapiens
comp76592_c0_seq26	0.555213	-0.306188	0.575547	-0.42811	-0.030814	TPTE2_MACFA_Phosphatidylinositol_3,4,5-trisphosphate_3-phosphatase_TPTE2_OS=Macaca_fascicularis_GN=TPTE2_PE=2_SV=1	Q4R6N0	59.54	transmembrane phosphoinositide 3-phosphatase and tensin homolog 2(TPTE2)	Macaca fascicularis
comp76595_c3_seq33	0.503502	-0.064031	0.518344	-0.275363	-0.151832	CPT1A_HUMAN_Carnitine_O-palmitoyltransferase_1,_liver_isoform_OS=Homo_sapiens_GN=CPT1A_PE=1_SV=2	P50416	66.67	carnitine palmitoyltransferase 1A(CPT1A)	Homo sapiens
comp76636_c0_seq4	0.406257	-0.278068	0.583409	-0.253731	-0.0140228	CTHR1_HUMAN_Collagen_triple_helix_repeat-containing_protein_1_OS=Homo_sapiens_GN=CTHRC1_PE=1_SV=1	Q96CG8	88.89	collagen triple helix repeat containing 1(CTHRC1)	Homo sapiens
comp76642_c1_seq2	0.449786	-0.225598	0.401212	-0.727901	-0.222285	MPV17_DANRE_Protein_Mpv17_OS=Danio_rerio_GN=mpv17_PE=2_SV=1	Q5TZ51	92.86	MpV17 mitochondrial inner membrane protein(mpv17)	Danio rerio
comp76647_c0_seq2	0.631022	-0.293498	0.373664	-0.214457	-0.0461268	LKHA4_BOVIN_Leukotriene_A-4_hydrolase_OS=Bos_taurus_GN=LTA4H_PE=2_SV=3	Q3SZH7	61.14	leukotriene A4 hydrolase(LTA4H)	Bos taurus
comp76742_c1_seq3	0.473038	-0.33462	0.922884	-0.920953	-0.0549457	ZBT26_HUMAN_Zinc_finger_and_BTB_domain-containing_protein_26_OS=Homo_sapiens_GN=ZBTB26_PE=2_SV=2	Q9HCK0	67.18	zinc finger and BTB domain containing 26(ZBTB26)	Homo sapiens
comp76807_c0_seq4	0.320889	-0.0757643	0.334159	-0.317038	-0.0665169	CFDP1_HUMAN_Craniofacial_development_protein_1_OS=Homo_sapiens_GN=CFDP1_PE=1_SV=1	Q9UEE9	62.67	craniofacial development protein 1(CFDP1)	Homo sapiens
comp76819_c3_seq2	0.260769	-0.231684	0.614157	-0.0789963	-0.409656	HEAT1_DANRE_HEAT_repeat-containing_protein_1_OS=Danio_rerio_GN=heatr1_PE=2_SV=1	Q7SY48	91.93	HEAT repeat containing 1(heatr1)	Danio rerio
comp76826_c1_seq2	0.28129	-0.0302928	0.421766	-0.44816	-0.385441	LCMT2_HUMAN_Leucine_carboxyl_methyltransferase_2_OS=Homo_sapiens_GN=LCMT2_PE=1_SV=3	O60294	44.41	leucine carboxyl methyltransferase 2(LCMT2)	Homo sapiens
comp76875_c1_seq2	0.517181	-0.0883468	0.524057	-0.153292	-0.213161	ANKY2_CHICK_Ankyrin_repeat_and_MYND_domain-containing_protein_2_OS=Gallus_gallus_GN=ANKMY2_PE=2_SV=1	Q5ZMD2	75.88	ankyrin repeat and MYND domain containing 2(ANKMY2)	Gallus gallus
comp76947_c1_seq1	0.393021	-0.167334	0.444452	-0.577704	-0.134479	RFC5_MOUSE_Replication_factor_C_subunit_5_OS=Mus_musculus_GN=Rfc5_PE=2_SV=1	Q9D0F6	89.37	replication factor C (activator 1) 5(Rfc5)	Mus musculus
comp76967_c1_seq5	0.285002	-0.0612113	0.414757	-0.0371118	-0.313561	ABCD4_HUMAN_ATP-binding_cassette_sub-family_D_member_4_OS=Homo_sapiens_GN=ABCD4_PE=2_SV=1	O14678	70.85	ATP binding cassette subfamily D member 4(ABCD4)	Homo sapiens
comp77054_c0_seq6	0.456759	-0.0298707	0.460115	-0.401868	0.00567182	CHCH6_DANRE_Coiled-coil-helix-coiled-coil-helix_domain-containing_protein_6,_mitochondrial_OS=Danio_rerio_GN=chchd6_PE=2_SV=1	Q63ZW2	43.93	coiled-coil-helix-coiled-coil-helix domain containing 6a(chchd6a)	Danio rerio
comp77060_c2_seq1	0.459381	-0.122752	0.366604	-1.13095	-0.111679	PINX1_RAT_PIN2/TERF1-interacting_telomerase_inhibitor_1_OS=Rattus_norvegicus_GN=Pinx1_PE=2_SV=1	A4L691	86.6	PIN2/TERF1 interacting, telomerase inhibitor 1(Pinx1)	Rattus norvegicus
comp77091_c0_seq6	0.273351	-0.214876	0.333197	-0.493699	-0.109306	ZN363_HUMAN_RING_finger_and_CHY_zinc_finger_domain-containing_protein_1_OS=Homo_sapiens_GN=RCHY1_PE=1_SV=1	Q96PM5	67.65	ring finger and CHY zinc finger domain containing 1(RCHY1)	Homo sapiens
comp77139_c0_seq5	0.467167	-0.382656	0.472751	-0.584906	-0.169434	TLR5_HUMAN_Toll-like_receptor_5_OS=Homo_sapiens_GN=TLR5_PE=1_SV=4	O60602	50.29	toll like receptor 5(TLR5)	Homo sapiens
comp77148_c1_seq2	0.270919	-0.0409341	0.529514	-0.76453	-0.176678	CALX_CANFA_Calnexin_OS=Canis_familiaris_GN=CANX_PE=1_SV=3	P24643	60.8	calnexin(CANX)	Canis lupus familiaris
comp77148_c2_seq2	0.38174	-0.0509135	0.45583	-0.231347	-0.131887	CALX_PONAB_Calnexin_OS=Pongo_abelii_GN=CANX_PE=2_SV=2	Q5R440	69.81	calnexin(CANX)	Pongo abelii
comp77195_c4_seq1	0.40627	0.211183	0.642575	-0.495238	-0.0778028	HINT3_DANRE_Histidine_triad_nucleotide-binding_protein_3_OS=Danio_rerio_GN=hint3_PE=2_SV=1	Q5PNN8	64.74	si:dkey-25e12.3(si:dkey-25e12.3)	Danio rerio
comp77207_c0_seq1	0.236008	-0.0702197	0.321462	-0.351563	-0.209291	RUVB1_DANRE_RuvB-like_1_OS=Danio_rerio_GN=ruvbl1_PE=2_SV=1	Q8AWW7	96.99	RuvB-like AAA ATPase 1(ruvbl1)	Danio rerio
comp77221_c0_seq2	0.411338	-0.152984	0.57758	-0.224234	-0.0320927	ADCK4_MOUSE_Uncharacterized_aarF_domain-containing_protein_kinase_4_OS=Mus_musculus_GN=Adck4_PE=2_SV=1	Q566J8	67.36	coenzyme Q8B(Coq8b)	Mus musculus
comp77254_c0_seq2	0.39455	-0.0470012	0.344901	-0.45917	-0.337388	NOL8_HUMAN_Nucleolar_protein_8_OS=Homo_sapiens_GN=NOL8_PE=1_SV=1	Q76FK4	43.11	nucleolar protein 8(NOL8)	Homo sapiens
comp77296_c0_seq1	0.424419	-0.0630283	0.408174	-0.257926	0.0228605	ACADM_BOVIN_Medium-chain_specific_acyl-CoA_dehydrogenase,_mitochondrial_OS=Bos_taurus_GN=ACADM_PE=2_SV=1	Q3SZB4	85	acyl-CoA dehydrogenase, C-4 to C-12 straight chain(ACADM)	Bos taurus
comp77300_c3_seq3	0.209859	-0.170457	0.384414	-2.72634	-0.29176	FKB1B_RABIT_Peptidyl-prolyl_cis-trans_isomerase_FKBP1B_OS=Oryctolagus_cuniculus_GN=FKBP1B_PE=3_SV=3	Q8HYX6	90.36	FK506 binding protein 1B(FKBP1B)	Oryctolagus cuniculus
comp77340_c0_seq1	0.379536	-0.169815	0.490987	-0.0811152	-0.239586	CSPP1_HUMAN_Centrosome_and_spindle_pole-associated_protein_1_OS=Homo_sapiens_GN=CSPP1_PE=1_SV=4	Q1MSJ5	29.78	centrosome and spindle pole associated protein 1(CSPP1)	Homo sapiens
comp77359_c0_seq7	0.366969	-0.0516804	0.442655	-0.497884	-0.233202	MOB3C_BOVIN_MOB_kinase_activator_3C_OS=Bos_taurus_GN=MOB3C_PE=2_SV=1	Q5EAA4	82.41	MOB kinase activator 3C(MOB3C)	Bos taurus
comp77423_c1_seq1	0.274557	-0.0693315	0.479726	-0.648109	-0.128846	TSN3_MOUSE_Tetraspanin-3_OS=Mus_musculus_GN=Tspan3_PE=1_SV=1	Q9QY33	41.77	tetraspanin 3(Tspan3)	Mus musculus
comp77456_c1_seq1	0.337275	-0.0850587	0.349681	-0.486369	-0.0507784	FA98A_MOUSE_Protein_FAM98A_OS=Mus_musculus_GN=Fam98a_PE=2_SV=1	Q3TJZ6	77.2	family with sequence similarity 98, member A(Fam98a)	Mus musculus
comp77456_c1_seq4	0.553278	-0.0283362	0.422792	-0.762149	-0.206626	FA98A_MOUSE_Protein_FAM98A_OS=Mus_musculus_GN=Fam98a_PE=2_SV=1	Q3TJZ6	77.6	family with sequence similarity 98, member A(Fam98a)	Mus musculus
comp77510_c0_seq2	0.581595	-0.226246	0.39139	-0.4168	-0.065458	WDR85_MOUSE_WD_repeat-containing_protein_85_OS=Mus_musculus_GN=Wdr85_PE=2_SV=1	Q9CYU6	45.2	diphthamine biosynethesis 7(Dph7)	Mus musculus
comp77516_c0_seq1	0.441286	-0.0558418	0.409024	-0.414774	-0.158322	NOM1_HUMAN_Nucleolar_MIF4G_domain-containing_protein_1_OS=Homo_sapiens_GN=NOM1_PE=1_SV=1	Q5C9Z4	66.17	nucleolar protein with MIF4G domain 1(NOM1)	Homo sapiens
comp77563_c0_seq2	0.438752	-0.206919	0.809061	-1.37979	-0.212435	ISCU_HUMAN_Iron-sulfur_cluster_assembly_enzyme_ISCU,_mitochondrial_OS=Homo_sapiens_GN=ISCU_PE=1_SV=2	Q9H1K1	76.92	iron-sulfur cluster assembly enzyme(ISCU)	Homo sapiens
comp77566_c0_seq6	0.316474	-0.0887594	0.453473	-0.396226	-0.103184	GTR8_RAT_Solute_carrier_family_2,_facilitated_glucose_transporter_member_8_OS=Rattus_norvegicus_GN=Slc2a8_PE=1_SV=1	Q9JJZ1	59.35	solute carrier family 2 member 8(Slc2a8)	Rattus norvegicus
comp77588_c1_seq6	0.302545	-0.0988315	0.342512	-0.185856	-0.0867275	IF2B_HUMAN_Eukaryotic_translation_initiation_factor_2_subunit_2_OS=Homo_sapiens_GN=EIF2S2_PE=1_SV=2	P20042	78.14	eukaryotic translation initiation factor 2 subunit beta(EIF2S2)	Homo sapiens
comp77600_c1_seq14	0.278585	-0.118317	0.354448	-1.23529	-0.171246	LITAF_DANRE_Lipopolysaccharide-induced_tumor_necrosis_factor-alpha_factor_homolog_OS=Danio_rerio_GN=litaf_PE=2_SV=1	Q6GMG8	67.74	lipopolysaccharide-induced TNF factor(litaf)	Danio rerio
comp77706_c0_seq3	0.388975	-0.267264	0.52769	-0.0728181	-0.490546	CNPY2_HUMAN_Protein_canopy_homolog_2_OS=Homo_sapiens_GN=CNPY2_PE=1_SV=1	Q9Y2B0	67.48	canopy FGF signaling regulator 2(CNPY2)	Homo sapiens
comp77707_c1_seq4	0.528652	-0.0277398	0.452333	-0.241861	-0.0101884	IF4B_HUMAN_Eukaryotic_translation_initiation_factor_4B_OS=Homo_sapiens_GN=EIF4B_PE=1_SV=2	P23588	71.09	eukaryotic translation initiation factor 4B(EIF4B)	Homo sapiens
comp77717_c1_seq9	0.414271	0.0145261	0.422127	-0.604224	-0.0897697	RL7L_PIG_60S_ribosomal_protein_L7-like_1_OS=Sus_scrofa_GN=RPL7L1_PE=3_SV=1	A5GFQ0	63.16	ribosomal protein L7 like 1(RPL7L1)	Sus scrofa
comp77725_c2_seq1	0.283177	-0.491509	0.336012	-0.962931	-0.135115	PSA3_RAT_Proteasome_subunit_alpha_type-3_OS=Rattus_norvegicus_GN=Psma3_PE=1_SV=3	P18422	90.74	proteasome subunit alpha 3(Psma3)	Rattus norvegicus
comp77744_c4_seq1	0.321075	-0.104026	0.314908	-0.588436	-0.0900037	SSRB_CANFA_Translocon-associated_protein_subunit_beta_OS=Canis_familiaris_GN=SSR2_PE=1_SV=1	P23438	93.98	signal sequence receptor subunit 2(SSR2)	Canis lupus familiaris
comp77754_c3_seq6	0.662885	-0.403632	0.781494	-0.244925	0.045802	THAP1_XENTR_THAP_domain-containing_protein_1_OS=Xenopus_tropicalis_GN=thap1_PE=2_SV=1	Q6DIN8	42.16	THAP domain containing, apoptosis associated protein 1(thap1)	Xenopus tropicalis
comp77868_c0_seq1	0.987178	-0.719774	0.805539	-0.290581	-0.0319419	TSG6_HUMAN_Tumor_necrosis_factor-inducible_gene_6_protein_OS=Homo_sapiens_GN=TNFAIP6_PE=1_SV=2	P98066	69.05	TNF alpha induced protein 6(TNFAIP6)	Homo sapiens
comp77868_c0_seq2	0.427006	-0.313717	0.368348	-0.707579	-0.128129	TSG6_MOUSE_Tumor_necrosis_factor-inducible_gene_6_protein_OS=Mus_musculus_GN=Tnfaip6_PE=2_SV=1	O08859	75.3	tumor necrosis factor alpha induced protein 6(Tnfaip6)	Mus musculus
comp77884_c0_seq1	0.425579	-0.336205	0.374292	-0.695431	-0.0935211	SET8A_DANRE_N-lysine_methyltransferase_SETD8-A_OS=Danio_rerio_GN=setd8a_PE=2_SV=1	Q071E0	48.11	SET domain containing (lysine methyltransferase) 8a(setd8a)	Danio rerio
comp77960_c1_seq2	0.478307	-0.125113	0.530032	-0.526079	-0.234443	DNJB1_HUMAN_DnaJ_homolog_subfamily_B_member_1_OS=Homo_sapiens_GN=DNAJB1_PE=1_SV=4	P25685	65.69	DnaJ heat shock protein family (Hsp40) member B1(DNAJB1)	Homo sapiens
comp77995_c2_seq1	0.287249	-0.205757	0.329792	-0.41111	-0.214084	MED6_DANRE_Mediator_of_RNA_polymerase_II_transcription_subunit_6_OS=Danio_rerio_GN=med6_PE=2_SV=1	Q6IQ63	95.88	mediator complex subunit 6(med6)	Danio rerio
comp78021_c0_seq4	0.325003	-0.423147	0.397204	-0.20021	-0.107925	A9A1A_DANRE_Aldehyde_dehydrogenase_family_9_member_A1-A_OS=Danio_rerio_GN=aldh9a1a_PE=2_SV=1	Q7ZVB2	95.28	aldehyde dehydrogenase 9 family, member A1a, tandem duplicate 1(aldh9a1a.1)	Danio rerio
comp78037_c0_seq1	0.354821	-0.13498	0.440678	-0.80591	-0.162007	B9D1_DANRE_B9_domain-containing_protein_1_OS=Danio_rerio_GN=b9d1_PE=2_SV=1	Q503B7	93.03	B9 protein domain 1(b9d1)	Danio rerio
comp78062_c0_seq2	0.49232	-0.0618355	0.518426	-0.584351	-0.265542	SRPRB_MOUSE_Signal_recognition_particle_receptor_subunit_beta_OS=Mus_musculus_GN=Srprb_PE=1_SV=1	P47758	62.39	signal recognition particle receptor, B subunit(Srprb)	Mus musculus
comp78062_c0_seq3	0.719387	-0.107006	0.649502	-0.453149	-0.179146	SRPRB_MOUSE_Signal_recognition_particle_receptor_subunit_beta_OS=Mus_musculus_GN=Srprb_PE=1_SV=1	P47758	65.19	signal recognition particle receptor, B subunit(Srprb)	Mus musculus
comp78062_c0_seq5	0.143521	-0.0113592	0.414274	-0.831218	-0.268169	SRPRB_MOUSE_Signal_recognition_particle_receptor_subunit_beta_OS=Mus_musculus_GN=Srprb_PE=1_SV=1	P47758	62.39	signal recognition particle receptor, B subunit(Srprb)	Mus musculus
comp78101_c1_seq3	0.415779	-0.100845	0.442969	-0.527031	0.0165078	PSD10_HUMAN_26S_proteasome_non-ATPase_regulatory_subunit_10_OS=Homo_sapiens_GN=PSMD10_PE=1_SV=1	O75832	73.45	proteasome 26S subunit, non-ATPase 10(PSMD10)	Homo sapiens
comp78124_c4_seq2	0.645007	-0.0906763	0.689093	-0.365975	-0.0243537	WDR73_DANRE_WD_repeat-containing_protein_73_OS=Danio_rerio_GN=wdr73_PE=2_SV=1	Q567G2	82.49	WD repeat domain 73(wdr73)	Danio rerio
comp78169_c2_seq2	0.218152	-0.030913	0.445734	-0.111065	-0.592645	DDX52_BOVIN_Probable_ATP-dependent_RNA_helicase_DDX52_OS=Bos_taurus_GN=DDX52_PE=2_SV=1	A5D7C1	64.47	DExD-box helicase 52(DDX52)	Bos taurus
comp78169_c2_seq4	0.263481	-0.0304946	0.419425	-1.02701	-0.257814	DDX52_BOVIN_Probable_ATP-dependent_RNA_helicase_DDX52_OS=Bos_taurus_GN=DDX52_PE=2_SV=1	A5D7C1	42.86	DExD-box helicase 52(DDX52)	Bos taurus
comp78229_c0_seq3	0.457372	-0.124456	0.352039	-0.360813	-0.0830676	VRK3_HUMAN_Inactive_serine/threonine-protein_kinase_VRK3_OS=Homo_sapiens_GN=VRK3_PE=1_SV=2	Q8IV63	36.88	vaccinia related kinase 3(VRK3)	Homo sapiens
comp78243_c0_seq2	0.488904	-0.0191806	0.54026	-0.418919	0.075469	PSMD6_HUMAN_26S_proteasome_non-ATPase_regulatory_subunit_6_OS=Homo_sapiens_GN=PSMD6_PE=1_SV=1	Q15008	92.29	proteasome 26S subunit, non-ATPase 6(PSMD6)	Homo sapiens
comp78273_c0_seq6	0.429439	0.191387	0.904204	-0.754212	-0.566235	CH25H_PIG_Cholesterol_25-hydroxylase_OS=Sus_scrofa_GN=CH25H_PE=2_SV=1	Q4G1G8	40.62	cholesterol 25-hydroxylase(CH25H)	Sus scrofa
comp78300_c0_seq6	0.352392	-0.227648	0.419115	-0.163168	-0.0373386	NOSIP_DANRE_Nitric_oxide_synthase-interacting_protein_OS=Danio_rerio_GN=nosip_PE=2_SV=1	Q5U3S7	89.47	nitric oxide synthase interacting protein(nosip)	Danio rerio
comp78475_c0_seq6	0.364585	-0.240822	0.293138	-0.23538	-0.127634	ATHL1_DANRE_Acid_trehalase-like_protein_1_OS=Danio_rerio_GN=athl1_PE=2_SV=1	A0JMP0	78.93	protein-glucosylgalactosylhydroxylysine glucosidase(pgghg)	Danio rerio
comp78495_c0_seq1	0.314334	-0.21191	0.308218	-0.580111	-0.090209	SMCA5_MOUSE_SWI/SNF-related_matrix-associated_actin-dependent_regulator_of_chromatin_subfamily_A_member_5_OS=Mus_musculus_GN=Smarca5_PE=1_SV=1	Q91ZW3	94.16	SWI/SNF related, matrix associated, actin dependent regulator of chromatin, subfamily a, member 5(Smarca5)	Mus musculus
comp78509_c0_seq3	0.339678	-0.140447	0.306049	-0.837805	-0.346393	TIM50_DANRE_Mitochondrial_import_inner_membrane_translocase_subunit_TIM50_OS=Danio_rerio_GN=timm50_PE=2_SV=2	Q6NWD4	91.73	translocase of inner mitochondrial membrane 50 homolog (S. cerevisiae)(timm50)	Danio rerio
comp78509_c0_seq4	0.42053	0.0875823	0.52721	-0.506148	-0.374743	TIM50_DANRE_Mitochondrial_import_inner_membrane_translocase_subunit_TIM50_OS=Danio_rerio_GN=timm50_PE=2_SV=2	Q6NWD4	91.73	translocase of inner mitochondrial membrane 50 homolog (S. cerevisiae)(timm50)	Danio rerio
comp78511_c0_seq5	0.565696	-0.0997724	1.06673	-0.334391	-0.869562	PIGW_BOVIN_Phosphatidylinositol-glycan_biosynthesis_class_W_protein_OS=Bos_taurus_GN=PIGW_PE=2_SV=1	Q1LZA4	40	phosphatidylinositol glycan anchor biosynthesis class W(PIGW)	Bos taurus
comp78511_c0_seq7	0.304354	0.03826	0.564296	-0.287895	-0.199364	PIGW_BOVIN_Phosphatidylinositol-glycan_biosynthesis_class_W_protein_OS=Bos_taurus_GN=PIGW_PE=2_SV=1	Q1LZA4	44.23	phosphatidylinositol glycan anchor biosynthesis class W(PIGW)	Bos taurus
comp78556_c0_seq4	0.491177	-0.0282086	0.407741	-0.297997	-0.145607	FAHD2_XENLA_Fumarylacetoacetate_hydrolase_domain-containing_protein_2_OS=Xenopus_laevis_GN=fahd2_PE=2_SV=1	Q6GLT8	62.04	fumarylacetoacetate hydrolase domain containing 2A L homeolog(fahd2a.L)	Xenopus laevis
comp78658_c0_seq4	0.449648	0.0168325	0.446254	-0.827329	-0.253888	ECSIT_DANRE_Evolutionarily_conserved_signaling_intermediate_in_Toll_pathway,_mitochondrial_OS=Danio_rerio_GN=ecsit_PE=2_SV=1	Q08CK1	79.87	ECSIT signalling integrator(ecsit)	Danio rerio
comp78686_c0_seq1	0.503857	0.0688511	0.464477	-0.643167	-0.658364	BORG2_MOUSE_Cdc42_effector_protein_3_OS=Mus_musculus_GN=Cdc42ep3_PE=1_SV=1	Q9CQC5	57.04	CDC42 effector protein (Rho GTPase binding) 3(Cdc42ep3)	Mus musculus
comp78686_c0_seq2	0.610623	-0.435347	0.595659	-0.125366	-0.343483	BORG2_MOUSE_Cdc42_effector_protein_3_OS=Mus_musculus_GN=Cdc42ep3_PE=1_SV=1	Q9CQC5	54.81	CDC42 effector protein (Rho GTPase binding) 3(Cdc42ep3)	Mus musculus
comp78699_c7_seq2	0.424465	-0.272086	0.257137	-0.628035	-0.125834	MCFD2_PONAB_Multiple_coagulation_factor_deficiency_protein_2_homolog_OS=Pongo_abelii_GN=MCFD2_PE=2_SV=1	Q5R8Z6	71.76	multiple coagulation factor deficiency 2(MCFD2)	Pongo abelii
comp78719_c0_seq1	0.380878	-0.102361	0.33058	-0.324972	-0.0606051	GLU2B_MOUSE_Glucosidase_2_subunit_beta_OS=Mus_musculus_GN=Prkcsh_PE=1_SV=1	O08795	61.36	protein kinase C substrate 80K-H(Prkcsh)	Mus musculus
comp78719_c0_seq10	0.359796	-0.0988814	0.465206	-0.241204	-0.0330861	GLU2B_MOUSE_Glucosidase_2_subunit_beta_OS=Mus_musculus_GN=Prkcsh_PE=1_SV=1	O08795	61.36	protein kinase C substrate 80K-H(Prkcsh)	Mus musculus
comp78719_c0_seq6	0.363749	-0.136779	0.482188	-0.280774	-0.0626009	GLU2B_MOUSE_Glucosidase_2_subunit_beta_OS=Mus_musculus_GN=Prkcsh_PE=1_SV=1	O08795	61.36	protein kinase C substrate 80K-H(Prkcsh)	Mus musculus
comp78719_c0_seq8	0.299251	-0.190914	0.467398	-0.306806	-0.139568	GLU2B_MOUSE_Glucosidase_2_subunit_beta_OS=Mus_musculus_GN=Prkcsh_PE=1_SV=1	O08795	61.36	protein kinase C substrate 80K-H(Prkcsh)	Mus musculus
comp78719_c0_seq9	0.43772	-0.0631251	0.359914	-0.217768	-0.0547249	GLU2B_MOUSE_Glucosidase_2_subunit_beta_OS=Mus_musculus_GN=Prkcsh_PE=1_SV=1	O08795	61.36	protein kinase C substrate 80K-H(Prkcsh)	Mus musculus
comp78776_c0_seq10	0.4169	-0.0309855	0.464363	-0.503421	-0.180943	ARFP2_RAT_Arfaptin-2_OS=Rattus_norvegicus_GN=Arfip2_PE=2_SV=1	Q6AY65	77.73	ADP-ribosylation factor interacting protein 2(Arfip2)	Rattus norvegicus
comp78776_c0_seq22	0.216973	-0.0698597	0.514104	-0.449235	-0.271157	ARFP2_HUMAN_Arfaptin-2_OS=Homo_sapiens_GN=ARFIP2_PE=1_SV=1	P53365	63.02	ADP ribosylation factor interacting protein 2(ARFIP2)	Homo sapiens
comp78819_c1_seq33	0.375084	-0.118518	0.366351	-0.833909	-0.284633	UCHL1_MACFA_Ubiquitin_carboxyl-terminal_hydrolase_isozyme_L1_OS=Macaca_fascicularis_GN=UCHL1_PE=2_SV=1	Q60HC8	64.56	ubiquitin C-terminal hydrolase L1(UCHL1)	Macaca fascicularis
comp78860_c0_seq3	0.512581	-0.176727	0.467787	-0.5844	-0.0999565	RPC9_BOVIN_DNA-directed_RNA_polymerase_III_subunit_RPC9_OS=Bos_taurus_GN=CRCP_PE=2_SV=1	A0JN61	72.92	CGRP receptor component(CRCP)	Bos taurus
comp78862_c0_seq5	0.216342	-0.208021	0.428487	-0.909307	-0.623162	TRUA_RAT_tRNA_pseudouridine_synthase_A,_mitochondrial_OS=Rattus_norvegicus_GN=Pus1_PE=2_SV=2	Q4KM92	71.59	pseudouridylate synthase 1(Pus1)	Rattus norvegicus
comp78862_c0_seq6	0.265358	-0.0535595	0.507436	-1.04832	-0.538874	TRUA_RAT_tRNA_pseudouridine_synthase_A,_mitochondrial_OS=Rattus_norvegicus_GN=Pus1_PE=2_SV=2	Q4KM92	71.59	pseudouridylate synthase 1(Pus1)	Rattus norvegicus
comp78863_c2_seq2	0.465072	-0.148721	0.590039	-0.20473	-0.0296961	MA2C1_HUMAN_Alpha-mannosidase_2C1_OS=Homo_sapiens_GN=MAN2C1_PE=1_SV=1	Q9NTJ4	61.9	mannosidase alpha class 2C member 1(MAN2C1)	Homo sapiens
comp78873_c0_seq7	0.410212	-0.145585	0.445536	-0.06298	-0.117122	BMS1_HUMAN_Ribosome_biogenesis_protein_BMS1_homolog_OS=Homo_sapiens_GN=BMS1_PE=1_SV=1	Q14692	60.87	BMS1, ribosome biogenesis factor(BMS1)	Homo sapiens
comp78878_c0_seq2	0.561858	-0.076587	0.326652	-0.903205	-0.461437	TRM11_MOUSE_tRNA_(guanine(10)-N2)-methyltransferase_homolog_OS=Mus_musculus_GN=Trmt11_PE=2_SV=1	Q9CWH5	61.56	tRNA methyltransferase 11(Trmt11)	Mus musculus
comp78921_c0_seq8	0.330167	-0.0804949	0.494358	-0.374076	-0.138839	EDIL3_MOUSE_EGF-like_repeat_and_discoidin_I-like_domain-containing_protein_3_OS=Mus_musculus_GN=Edil3_PE=1_SV=2	O35474	52.7	EGF-like repeats and discoidin I-like domains 3(Edil3)	Mus musculus
comp78953_c0_seq1	0.666721	-0.13737	0.677691	-0.218465	0.0200516	RRP44_MOUSE_Exosome_complex_exonuclease_RRP44_OS=Mus_musculus_GN=Dis3_PE=2_SV=4	Q9CSH3	63.29	DIS3 homolog, exosome endoribonuclease and 3'-5' exoribonuclease(Dis3)	Mus musculus
comp78958_c1_seq8	0.405161	-0.0222117	0.568345	-0.203344	-0.184331	ATAD5_HUMAN_ATPase_family_AAA_domain-containing_protein_5_OS=Homo_sapiens_GN=ATAD5_PE=1_SV=4	Q96QE3	47.8	ATPase family, AAA domain containing 5(ATAD5)	Homo sapiens
comp78982_c0_seq5	0.479488	-0.0274854	0.563783	-0.558233	-0.0845928	PACE1_MOUSE_Protein-associating_with_the_carboxyl-terminal_domain_of_ezrin_OS=Mus_musculus_GN=Scyl3_PE=1_SV=3	Q9DBQ7	32.78	SCY1-like 3 (S. cerevisiae)(Scyl3)	Mus musculus
comp79054_c1_seq1	0.288512	-0.235223	0.496321	-0.583004	-0.197588	FRIM_SALSA_Ferritin,_middle_subunit_OS=Salmo_salar_PE=2_SV=1	P49947	76.67	ferritin middle subunit(LOC100136565)	Salmo salar
comp79064_c2_seq1	0.370641	-0.0860766	0.482112	-0.502278	-0.194075	DCNL2_MOUSE_DCN1-like_protein_2_OS=Mus_musculus_GN=Dcun1d2_PE=2_SV=3	Q8BZJ7	85.94	DCN1, defective in cullin neddylation 1, domain containing 2 (S. cerevisiae)(Dcun1d2)	Mus musculus
comp79081_c0_seq4	0.464023	-0.0397884	0.743764	-0.382099	-0.109728	PRKDC_CHICK_DNA-dependent_protein_kinase_catalytic_subunit_OS=Gallus_gallus_GN=PRKDC_PE=2_SV=1	Q8QGX4	57.36	protein kinase, DNA-activated, catalytic polypeptide(PRKDC)	Gallus gallus
comp79088_c0_seq4	0.435265	-0.250229	0.514981	-0.113514	-0.000918706	FIS1_HUMAN_Mitochondrial_fission_1_protein_OS=Homo_sapiens_GN=FIS1_PE=1_SV=2	Q9Y3D6	63.64	fission, mitochondrial 1(FIS1)	Homo sapiens
comp79140_c1_seq12	0.377748	-0.0478743	0.334528	-0.22258	-0.166702	DDRGK_DANRE_DDRGK_domain-containing_protein_1_OS=Danio_rerio_GN=ddrgk1_PE=2_SV=1	Q6P0E5	87.23	DDRGK domain containing 1(ddrgk1)	Danio rerio
comp79146_c1_seq1	0.324596	-0.0428108	0.438155	-0.554071	-0.153104	PRS4_RAT_26S_protease_regulatory_subunit_4_OS=Rattus_norvegicus_GN=Psmc1_PE=2_SV=1	P62193	96.82	proteasome 26S subunit, ATPase 1(Psmc1)	Rattus norvegicus
comp79146_c1_seq2	0.273909	-0.0960995	0.376918	-0.648893	-0.230337	PRS4_RAT_26S_protease_regulatory_subunit_4_OS=Rattus_norvegicus_GN=Psmc1_PE=2_SV=1	P62193	96.59	proteasome 26S subunit, ATPase 1(Psmc1)	Rattus norvegicus
comp79165_c0_seq1	0.577875	-0.0968301	0.530681	-0.429399	0.0189853	MOG1_BOVIN_Ran_guanine_nucleotide_release_factor_OS=Bos_taurus_GN=RANGRF_PE=2_SV=1	Q32PE2	51.06	RAN guanine nucleotide release factor(RANGRF)	Bos taurus
comp79165_c0_seq3	0.571295	-0.121681	0.549236	-0.316572	-0.00320133	MOG1_BOVIN_Ran_guanine_nucleotide_release_factor_OS=Bos_taurus_GN=RANGRF_PE=2_SV=1	Q32PE2	48.09	RAN guanine nucleotide release factor(RANGRF)	Bos taurus
comp79166_c0_seq5	0.452186	-0.0377126	0.351318	-0.441246	-0.0290672	WDR41_HUMAN_WD_repeat-containing_protein_41_OS=Homo_sapiens_GN=WDR41_PE=2_SV=3	Q9HAD4	54.73	WD repeat domain 41(WDR41)	Homo sapiens
comp79237_c0_seq5	0.523817	-0.23888	0.423862	-0.855019	-0.0822183	TIM22_BOVIN_Mitochondrial_import_inner_membrane_translocase_subunit_Tim22_OS=Bos_taurus_GN=TIMM22_PE=2_SV=1	Q5BIN4	78.92	translocase of inner mitochondrial membrane 22(TIMM22)	Bos taurus
comp79254_c0_seq1	0.456893	-0.347051	0.333914	-0.712781	-0.0449672	CLPP_MOUSE_Putative_ATP-dependent_Clp_protease_proteolytic_subunit,_mitochondrial_OS=Mus_musculus_GN=Clpp_PE=2_SV=1	O88696	73.33	caseinolytic mitochondrial matrix peptidase proteolytic subunit(Clpp)	Mus musculus
comp79277_c0_seq4	0.30941	-0.166627	0.41653	-0.384846	-0.118654	KAT8_HUMAN_Histone_acetyltransferase_KAT8_OS=Homo_sapiens_GN=KAT8_PE=1_SV=2	Q9H7Z6	91.58	lysine acetyltransferase 8(KAT8)	Homo sapiens
comp79319_c0_seq1	0.198393	-0.184283	0.292178	0.0586999	-0.197517	GIMA8_HUMAN_GTPase_IMAP_family_member_8_OS=Homo_sapiens_GN=GIMAP8_PE=1_SV=2	Q8ND71	29.08	GTPase, IMAP family member 8(GIMAP8)	Homo sapiens
comp79323_c3_seq2	0.436297	-0.10983	0.295413	-0.290194	-0.266556	VDAC2_MELGA_Voltage-dependent_anion-selective_channel_protein_2_OS=Meleagris_gallopavo_GN=VDAC2_PE=1_SV=1	P82013	72.34	voltage dependent anion channel 2(VDAC2)	Meleagris gallopavo
comp79346_c0_seq2	0.204213	0.00196123	0.397828	-0.362675	-0.229177	GIN1_PONAB_Gypsy_retrotransposon_integrase-like_protein_1_OS=Pongo_abelii_GN=GIN1_PE=2_SV=1	Q5RBK0	29.28	gypsy retrotransposon integrase 1(GIN1)	Pongo abelii
comp79368_c3_seq1	0.290875	-0.0493018	0.345616	-0.547121	-0.0980516	EGFR_CHICK_Epidermal_growth_factor_receptor_(Fragment)_OS=Gallus_gallus_GN=EGFR_PE=2_SV=1	P13387	76.47	epidermal growth factor receptor(EGFR)	Gallus gallus
comp79383_c0_seq3	0.552961	-0.105755	0.439411	-0.580821	-0.0864243	GCDH_BOVIN_Glutaryl-CoA_dehydrogenase,_mitochondrial_OS=Bos_taurus_GN=GCDH_PE=2_SV=1	Q2KHZ9	81.47	glutaryl-CoA dehydrogenase(GCDH)	Bos taurus
comp79394_c1_seq12	0.257681	-0.201351	0.454104	-0.709387	-0.133746	DRAM1_MOUSE_DNA_damage-regulated_autophagy_modulator_protein_1_OS=Mus_musculus_GN=Dram1_PE=2_SV=2	Q9DC58	50.81	DNA-damage regulated autophagy modulator 1(Dram1)	Mus musculus
comp79492_c0_seq9	0.398042	-0.259958	0.557024	-0.675474	-0.309207	PR38B_DANRE_Pre-mRNA-splicing_factor_38B_OS=Danio_rerio_GN=prpf38b_PE=2_SV=1	Q6P7Y3	98.59	pre-mRNA processing factor 38B(prpf38b)	Danio rerio
comp79494_c1_seq3	0.403758	-0.137747	0.397369	-0.537004	-0.00325457	ATG3_DANRE_Ubiquitin-like-conjugating_enzyme_ATG3_OS=Danio_rerio_GN=atg3_PE=2_SV=1	Q6PFS7	97.71	autophagy related 3(atg3)	Danio rerio
comp79494_c1_seq4	0.214603	-0.151175	0.313997	-0.487664	-0.171948	ATG3_DANRE_Ubiquitin-like-conjugating_enzyme_ATG3_OS=Danio_rerio_GN=atg3_PE=2_SV=1	Q6PFS7	95.87	autophagy related 3(atg3)	Danio rerio
comp79510_c0_seq19	0.266937	0.254021	0.66094	-1.4223	-0.248098	TRPM1_RAT_Transient_receptor_potential_cation_channel_subfamily_M_member_1_OS=Rattus_norvegicus_GN=Trpm1_PE=2_SV=1	Q2WEA5	76.02	transient receptor potential cation channel, subfamily M, member 1(Trpm1)	Rattus norvegicus
comp79510_c0_seq31	0.644899	-0.0828118	0.606692	-1.21766	-0.339391	TRPM1_RAT_Transient_receptor_potential_cation_channel_subfamily_M_member_1_OS=Rattus_norvegicus_GN=Trpm1_PE=2_SV=1	Q2WEA5	74.79	transient receptor potential cation channel, subfamily M, member 1(Trpm1)	Rattus norvegicus
comp79510_c0_seq40	0.244085	-0.105643	0.338871	-1.46139	-0.681065	TRPM1_RAT_Transient_receptor_potential_cation_channel_subfamily_M_member_1_OS=Rattus_norvegicus_GN=Trpm1_PE=2_SV=1	Q2WEA5	74.79	transient receptor potential cation channel, subfamily M, member 1(Trpm1)	Rattus norvegicus
comp79525_c0_seq4	0.372461	-0.00518703	0.466262	-0.182063	-0.191624	MAPK3_BOVIN_MAP_kinase-activated_protein_kinase_3_OS=Bos_taurus_GN=MAPKAPK3_PE=2_SV=1	Q3SYZ2	82.72	mitogen-activated protein kinase-activated protein kinase 3(MAPKAPK3)	Bos taurus
comp79525_c0_seq5	0.40139	-0.00469589	0.553406	-0.101913	-0.105171	MAPK3_BOVIN_MAP_kinase-activated_protein_kinase_3_OS=Bos_taurus_GN=MAPKAPK3_PE=2_SV=1	Q3SYZ2	82.72	mitogen-activated protein kinase-activated protein kinase 3(MAPKAPK3)	Bos taurus
comp79543_c0_seq1	0.42475	-0.156578	0.41647	-0.492054	-0.275199	SERC_HUMAN_Phosphoserine_aminotransferase_OS=Homo_sapiens_GN=PSAT1_PE=1_SV=2	Q9Y617	78.37	phosphoserine aminotransferase 1(PSAT1)	Homo sapiens
comp79553_c3_seq1	0.100834	-0.164293	0.230808	-1.23629	-0.290649	SMD3_XENLA_Small_nuclear_ribonucleoprotein_Sm_D3_OS=Xenopus_laevis_GN=snrpd3_PE=2_SV=1	P62323	94.53	small nuclear ribonucleoprotein D3 polypeptide L homeolog(snrpd3.L)	Xenopus laevis
comp79707_c0_seq3	0.359473	-0.108083	0.33687	-0.796577	-0.0990508	QNR71_COTJA_Protein_QNR-71_OS=Coturnix_coturnix_japonica_GN=QNR-71_PE=2_SV=2	Q90372	33.54	glycoprotein nmb(GPNMB)	Coturnix japonica
comp79707_c0_seq4	0.45349	-0.00571442	0.440962	-0.734413	-0.12418	QNR71_COTJA_Protein_QNR-71_OS=Coturnix_coturnix_japonica_GN=QNR-71_PE=2_SV=2	Q90372	33.74	glycoprotein nmb(GPNMB)	Coturnix japonica
comp79716_c1_seq5	0.337205	0.0751521	0.554733	-0.822535	-0.579454	USE1_DANRE_Vesicle_transport_protein_USE1_OS=Danio_rerio_GN=use1_PE=2_SV=1	Q7ZTY7	88.49	unconventional SNARE in the ER 1 homolog (S. cerevisiae)(use1)	Danio rerio
comp79730_c1_seq3	0.445165	-0.195246	0.51739	-0.591231	-0.0142562	TSR1_XENLA_Pre-rRNA-processing_protein_TSR1_homolog_OS=Xenopus_laevis_GN=tsr1_PE=2_SV=1	Q5XGY1	70.78	TSR1, 20S rRNA accumulation, homolog L homeolog(tsr1.L)	Xenopus laevis
comp79730_c1_seq4	0.430657	-0.184064	0.347848	-0.574326	-0.219569	TSR1_MOUSE_Pre-rRNA-processing_protein_TSR1_homolog_OS=Mus_musculus_GN=Tsr1_PE=2_SV=1	Q5SWD9	55.66	TSR1 20S rRNA accumulation(Tsr1)	Mus musculus
comp79736_c0_seq4	0.561421	-0.177447	0.521375	-0.994253	-0.0837832	RBM12_MACMU_RNA-binding_protein_12_OS=Macaca_mulatta_GN=RBM12_PE=2_SV=1	Q8SQ27	41.22	RNA binding motif protein 12(RBM12)	Macaca mulatta
comp79768_c0_seq3	0.781466	-0.118476	0.829067	-0.355809	0.0678312	MESD_DANRE_LDLR_chaperone_MESD_OS=Danio_rerio_GN=mesdc2_PE=2_SV=2	A1L243	91.67	mesoderm development candidate 2(mesdc2)	Danio rerio
comp79768_c0_seq4	0.335225	-0.553996	0.391641	-0.742693	-0.0772486	MESD_DANRE_LDLR_chaperone_MESD_OS=Danio_rerio_GN=mesdc2_PE=2_SV=2	A1L243	89.81	mesoderm development candidate 2(mesdc2)	Danio rerio
comp79975_c0_seq21	0.452293	-0.230614	0.665656	-0.551281	-0.0225172	UBP22_BOVIN_Ubiquitin_carboxyl-terminal_hydrolase_22_OS=Bos_taurus_GN=USP22_PE=2_SV=1	P0C8Z3	35.04	ubiquitin specific peptidase 22(USP22)	Bos taurus
comp79976_c0_seq2	0.613047	-0.0352103	0.587924	-0.650255	0.0463872	PRS7_RAT_26S_protease_regulatory_subunit_7_OS=Rattus_norvegicus_GN=Psmc2_PE=1_SV=3	Q63347	100	proteasome 26S subunit, ATPase 2(Psmc2)	Rattus norvegicus
comp80029_c0_seq14	0.440664	-0.220275	0.559358	-0.191276	0.00443935	HNRPM_RAT_Heterogeneous_nuclear_ribonucleoprotein_M_OS=Rattus_norvegicus_GN=Hnrnpm_PE=1_SV=4	Q62826	49.43	heterogeneous nuclear ribonucleoprotein M(Hnrnpm)	Rattus norvegicus
comp80029_c0_seq4	0.683928	-0.304653	0.681417	-0.292764	0.10837	HNRPM_MOUSE_Heterogeneous_nuclear_ribonucleoprotein_M_OS=Mus_musculus_GN=Hnrnpm_PE=1_SV=3	Q9D0E1	55.86	heterogeneous nuclear ribonucleoprotein M(Hnrnpm)	Mus musculus
comp80125_c1_seq4	0.458446	-0.0505673	0.397587	-0.276376	-0.100714	RT18B_MACMU_28S_ribosomal_protein_S18b,_mitochondrial_OS=Macaca_mulatta_GN=MRPS18B_PE=3_SV=1	Q5TM62	57.22	mitochondrial ribosomal protein S18B(MRPS18B)	Macaca mulatta
comp80137_c0_seq7	0.42684	0.0167948	0.435065	-0.638637	-0.276935	CH10_HUMAN_10_kDa_heat_shock_protein,_mitochondrial_OS=Homo_sapiens_GN=HSPE1_PE=1_SV=2	P61604	84.85	heat shock protein family E (Hsp10) member 1(HSPE1)	Homo sapiens
comp80162_c1_seq3	0.415346	-0.141024	0.307404	-0.87564	-0.134105	ATPK_MOUSE_ATP_synthase_subunit_f,_mitochondrial_OS=Mus_musculus_GN=Atp5j2_PE=1_SV=3	P56135	61.9	ATP synthase, H+ transporting, mitochondrial F0 complex, subunit F2(Atp5j2)	Mus musculus
comp80164_c0_seq5	0.366164	-0.0484738	0.450911	-0.199388	-0.172321	GLYC_RABIT_Serine_hydroxymethyltransferase,_cytosolic_OS=Oryctolagus_cuniculus_GN=SHMT1_PE=1_SV=2	P07511	82.48	serine hydroxymethyltransferase 1(SHMT1)	Oryctolagus cuniculus
comp80204_c0_seq5	0.38879	-0.0457489	0.341858	-0.0353854	-0.318952	NADAP_HUMAN_Kanadaptin_OS=Homo_sapiens_GN=SLC4A1AP_PE=1_SV=1	Q9BWU0	56.51	solute carrier family 4 member 1 adaptor protein(SLC4A1AP)	Homo sapiens
comp80291_c0_seq7	0.112718	-0.202507	0.276773	0.0215678	-0.396068	TBC15_HUMAN_TBC1_domain_family_member_15_OS=Homo_sapiens_GN=TBC1D15_PE=1_SV=2	Q8TC07	75.96	TBC1 domain family member 15(TBC1D15)	Homo sapiens
comp80304_c5_seq2	0.239745	-0.351186	0.382125	-1.3855	-0.259322	SPD2A_DANRE_SH3_and_PX_domain-containing_protein_2A_OS=Danio_rerio_GN=sh3pxd2a_PE=3_SV=2	Q1LYG0	66.67	SH3 and PX domains 2Aa(sh3pxd2aa)	Danio rerio
comp80324_c0_seq9	0.373441	-0.054403	0.386549	-0.515042	-0.0295029	PRP31_DANRE_U4/U6_small_nuclear_ribonucleoprotein_Prp31_OS=Danio_rerio_GN=prpf31_PE=2_SV=1	Q7SXM7	88.8	PRP31 pre-mRNA processing factor 31 homolog (yeast)(prpf31)	Danio rerio
comp80389_c0_seq4	0.528427	-0.189763	0.368193	-1.0661	-0.0237672	SNG1_RAT_Synaptogyrin-1_OS=Rattus_norvegicus_GN=Syngr1_PE=2_SV=1	Q62876	72.46	synaptogyrin 1(Syngr1)	Rattus norvegicus
comp80445_c1_seq32	0.411144	-0.540911	0.350221	-0.222265	-0.158484	SCNM1_DANRE_Sodium_channel_modifier_1_OS=Danio_rerio_GN=scnm1_PE=2_SV=1	Q2YDS5	76.56	sodium channel modifier 1(scnm1)	Danio rerio
comp80446_c1_seq2	0.72207	-0.175339	0.500256	-0.103042	-0.0237881	RBM5_XENTR_RNA-binding_protein_5_OS=Xenopus_tropicalis_GN=rbm5_PE=2_SV=1	A4IGK4	78.92	RNA binding motif protein 5(rbm5)	Xenopus tropicalis
comp80446_c1_seq4	0.424712	-0.262071	0.324065	-0.0518311	-0.212519	RBM5_XENTR_RNA-binding_protein_5_OS=Xenopus_tropicalis_GN=rbm5_PE=2_SV=1	A4IGK4	78.63	RNA binding motif protein 5(rbm5)	Xenopus tropicalis
comp80474_c0_seq4	0.508298	-0.0213612	0.494762	-0.099833	-0.0795439	ERCC2_MOUSE_TFIIH_basal_transcription_factor_complex_helicase_XPD_subunit_OS=Mus_musculus_GN=Ercc2_PE=2_SV=2	O08811	84.06	excision repair cross-complementing rodent repair deficiency, complementation group 2(Ercc2)	Mus musculus
comp80482_c0_seq2	0.364645	-0.170718	0.433786	-0.332596	-0.0184867	NCBP1_SALSA_Nuclear_cap-binding_protein_subunit_1_OS=Salmo_salar_GN=ncbp1_PE=2_SV=1	C0H906	87.36	Nuclear cap-binding protein subunit 1-A(nbp1a)	Salmo salar
comp80494_c0_seq2	0.289284	-0.0874144	0.306453	-0.427066	-0.130825	TCEA1_HUMAN_Transcription_elongation_factor_A_protein_1_OS=Homo_sapiens_GN=TCEA1_PE=1_SV=2	P23193	74.49	transcription elongation factor A1(TCEA1)	Homo sapiens
comp80508_c0_seq17	0.388088	-0.315945	0.452189	-0.62839	0.00422255	TBA8_CHICK_Tubulin_alpha-8_chain_(Fragment)_OS=Gallus_gallus_PE=3_SV=1	P09645	96.58	tubulin, alpha 3e(TUBA3E)	Gallus gallus
comp80508_c0_seq7	0.334619	-0.452921	0.301073	-0.575841	-0.109449	TBA1C_BOVIN_Tubulin_alpha-1C_chain_OS=Bos_taurus_GN=TUBA1C_PE=1_SV=1	Q3ZCJ7	95.54	tubulin, alpha 1c(TUBA1C)	Bos taurus
comp80542_c0_seq6	0.40538	-0.133047	0.737739	-0.407982	-0.469214	TPC11_DANRE_Trafficking_protein_particle_complex_subunit_11_OS=Danio_rerio_GN=trappc11_PE=2_SV=1	Q1RLX4	91.41	trafficking protein particle complex 11(trappc11)	Danio rerio
comp80556_c0_seq2	0.436738	-0.214657	0.649813	-0.605708	-0.00197077	AFG31_MOUSE_AFG3-like_protein_1_OS=Mus_musculus_GN=Afg3l1_PE=2_SV=2	Q920A7	80.61	AFG3-like AAA ATPase 1(Afg3l1)	Mus musculus
comp80592_c0_seq5	0.369353	-0.365003	0.412513	-0.178676	-0.085611	PLPL7_MOUSE_Patatin-like_phospholipase_domain-containing_protein_7_OS=Mus_musculus_GN=Pnpla7_PE=1_SV=1	A2AJ88	71.51	patatin-like phospholipase domain containing 7(Pnpla7)	Mus musculus
comp80602_c0_seq1	0.559727	-0.0786306	0.588731	-0.425791	0.0537728	NUCB1_MOUSE_Nucleobindin-1_OS=Mus_musculus_GN=Nucb1_PE=1_SV=2	Q02819	62.99	nucleobindin 1(Nucb1)	Mus musculus
comp80602_c0_seq13	0.529169	-0.265124	0.562609	-0.256118	0.0375659	NUCB1_MOUSE_Nucleobindin-1_OS=Mus_musculus_GN=Nucb1_PE=1_SV=2	Q02819	61.59	nucleobindin 1(Nucb1)	Mus musculus
comp80602_c0_seq14	0.345369	-0.0214181	0.452526	-0.612771	-0.275942	NUCB1_MOUSE_Nucleobindin-1_OS=Mus_musculus_GN=Nucb1_PE=1_SV=2	Q02819	48.17	nucleobindin 1(Nucb1)	Mus musculus
comp80602_c0_seq19	0.354935	-0.272512	0.51492	-0.171885	-0.0413364	NUCB1_MOUSE_Nucleobindin-1_OS=Mus_musculus_GN=Nucb1_PE=1_SV=2	Q02819	61.74	nucleobindin 1(Nucb1)	Mus musculus
comp80602_c0_seq20	0.594241	-0.192267	0.604586	-0.0371714	0.143743	NUCB1_MOUSE_Nucleobindin-1_OS=Mus_musculus_GN=Nucb1_PE=1_SV=2	Q02819	61.74	nucleobindin 1(Nucb1)	Mus musculus
comp80602_c0_seq22	0.403603	-0.0660324	0.477922	-0.525978	-0.047582	NUCB1_MOUSE_Nucleobindin-1_OS=Mus_musculus_GN=Nucb1_PE=1_SV=2	Q02819	64.43	nucleobindin 1(Nucb1)	Mus musculus
comp80602_c0_seq3	0.487555	-0.366105	0.466003	-0.217935	0.0152183	NUCB1_MOUSE_Nucleobindin-1_OS=Mus_musculus_GN=Nucb1_PE=1_SV=2	Q02819	59.63	nucleobindin 1(Nucb1)	Mus musculus
comp80704_c0_seq2	0.564015	-0.154172	0.500292	-0.93959	-0.150627	CT024_MOUSE_Uncharacterized_protein_C20orf24_homolog_OS=Mus_musculus_PE=2_SV=1	Q9CQT9	71.88	RIKEN cDNA 1110008F13 gene(1110008F13Rik)	Mus musculus
comp80704_c0_seq3	0.643636	-0.273271	0.412411	-0.709774	-0.15645	CT024_MOUSE_Uncharacterized_protein_C20orf24_homolog_OS=Mus_musculus_PE=2_SV=1	Q9CQT9	71.88	RIKEN cDNA 1110008F13 gene(1110008F13Rik)	Mus musculus
comp80735_c0_seq8	0.704843	-0.329501	0.492619	-0.386999	-0.141824	COQ6_BOVIN_Ubiquinone_biosynthesis_monooxygenase_COQ6_OS=Bos_taurus_GN=COQ6_PE=2_SV=1	Q2KIL4	71.22	coenzyme Q6, monooxygenase(COQ6)	Bos taurus
comp80795_c0_seq2	0.329362	-0.145416	0.462148	-0.579828	-0.206919	SPOLB_DANRE_Speckle-type_POZ_protein-like_B_OS=Danio_rerio_GN=spoplb_PE=2_SV=2	A0JMG1	96.39	speckle-type POZ protein-like b(spoplb)	Danio rerio
comp80796_c3_seq4	0.359892	-0.0695931	0.561003	-0.732526	-0.069847	YB039_MOUSE_Uncharacterized_protein_LINC00116_homolog_OS=Mus_musculus_PE=2_SV=1	Q8BT35	75	RIKEN cDNA 1500011K16 gene(1500011K16Rik)	Mus musculus
comp80796_c3_seq6	0.343787	0.0242163	0.800702	-0.927122	-0.0756002	YB039_MOUSE_Uncharacterized_protein_LINC00116_homolog_OS=Mus_musculus_PE=2_SV=1	Q8BT35	75	RIKEN cDNA 1500011K16 gene(1500011K16Rik)	Mus musculus
comp80814_c0_seq1	0.421808	-0.416923	0.423328	-0.691787	0.0395015	ATLA1_BOVIN_Atlastin-1_OS=Bos_taurus_GN=ATL1_PE=2_SV=2	Q58D72	70.37	atlastin GTPase 1(ATL1)	Bos taurus
comp80912_c0_seq1	0.322858	-0.107766	0.556874	-0.421975	-0.4855	ZMAT1_XENTR_Zinc_finger_matrin-type_protein_1_OS=Xenopus_tropicalis_GN=zmat1_PE=2_SV=1	Q28EG9	45.19	lysine-rich coiled-coil 1(krcc1)	Xenopus tropicalis
comp80912_c0_seq4	0.617691	-0.129681	0.634136	-0.448202	0.0541701	ZMAT1_XENTR_Zinc_finger_matrin-type_protein_1_OS=Xenopus_tropicalis_GN=zmat1_PE=2_SV=1	Q28EG9	44.59	lysine-rich coiled-coil 1(krcc1)	Xenopus tropicalis
comp80917_c0_seq2	0.337868	-0.057052	0.393832	-0.195055	-0.127849	TCPG_XENLA_T-complex_protein_1_subunit_gamma_OS=Xenopus_laevis_GN=cct3_PE=2_SV=2	P50143	89.32	chaperonin containing TCP1 subunit 3 L homeolog(cct3.L)	Xenopus laevis
comp80929_c0_seq51	0.392923	-0.181465	0.543815	-0.802803	-0.271695	RN220_HUMAN_E3_ubiquitin-protein_ligase_RNF220_OS=Homo_sapiens_GN=RNF220_PE=1_SV=1	Q5VTB9	70.36	ring finger protein 220(RNF220)	Homo sapiens
comp81023_c2_seq2	0.359124	-0.0477966	0.413011	-0.0497802	-0.0213006	MPPA_PONAB_Mitochondrial-processing_peptidase_subunit_alpha_OS=Pongo_abelii_GN=PMPCA_PE=2_SV=2	Q5R513	86.36	peptidase, mitochondrial processing alpha subunit(PMPCA)	Pongo abelii
comp81056_c1_seq13	0.311091	-0.600194	0.297896	-0.257201	-0.0923958	RTF1_HUMAN_RNA_polymerase-associated_protein_RTF1_homolog_OS=Homo_sapiens_GN=RTF1_PE=1_SV=4	Q92541	84.66	RTF1 homolog, Paf1/RNA polymerase II complex component(RTF1)	Homo sapiens
comp81060_c1_seq1	0.269636	-0.113723	0.368964	-0.43752	-0.146949	F1142_BOVIN_Protein_FAM114A2_OS=Bos_taurus_GN=FAM114A1_PE=2_SV=1	Q2T9N1	50	family with sequence similarity 114 member A2(FAM114A2)	Bos taurus
comp81090_c0_seq3	0.36725	-0.0245312	0.361221	-0.340959	-0.069279	ACL6A_MOUSE_Actin-like_protein_6A_OS=Mus_musculus_GN=Actl6a_PE=1_SV=2	Q9Z2N8	94.79	actin-like 6A(Actl6a)	Mus musculus
comp81105_c2_seq4	0.528415	-0.392296	0.61985	-0.587886	-0.0462641	KDIS_DANRE_Kinase_D-interacting_substrate_of_220_kDa_OS=Danio_rerio_GN=kidins220_PE=2_SV=2	Q7T163	81.94	kinase D-interacting substrate 220b(kidins220b)	Danio rerio
comp81108_c1_seq6	0.232481	-0.0332904	0.497173	-0.662766	-0.222769	PP4CA_DANRE_Serine/threonine-protein_phosphatase_4_catalytic_subunit_A_OS=Danio_rerio_GN=ppp4ca_PE=2_SV=1	A8WGP3	96.6	protein phosphatase 4, catalytic subunit a(ppp4ca)	Danio rerio
comp81174_c0_seq5	0.339415	-0.202523	0.354487	-0.792127	-0.0705538	CCD82_RAT_Coiled-coil_domain-containing_protein_82_OS=Rattus_norvegicus_GN=Ccdc82_PE=2_SV=1	Q66H73	42.25	coiled-coil domain containing 82(Ccdc82)	Rattus norvegicus
comp81192_c0_seq1	0.325083	-0.094862	0.326993	-0.485619	-0.108244	SAM5A_DANRE_Sorting_and_assembly_machinery_component_50_homolog_A_OS=Danio_rerio_GN=samm50a_PE=2_SV=1	Q803G5	95.52	SAMM50 sorting and assembly machinery component(samm50)	Danio rerio
comp81216_c2_seq1	0.482985	-0.200993	0.512172	-0.363422	-0.0252401	VPS11_HUMAN_Vacuolar_protein_sorting-associated_protein_11_homolog_OS=Homo_sapiens_GN=VPS11_PE=1_SV=1	Q9H270	68.65	VPS11, CORVET/HOPS core subunit(VPS11)	Homo sapiens
comp81270_c1_seq2	0.274711	-0.172417	0.349762	-0.298052	-0.197616	GSHR_MOUSE_Glutathione_reductase,_mitochondrial_OS=Mus_musculus_GN=Gsr_PE=2_SV=3	P47791	71.03	glutathione reductase(Gsr)	Mus musculus
comp81323_c0_seq1	0.299217	-0.0691538	0.446752	-0.434187	-0.267108	PGTB2_HUMAN_Geranylgeranyl_transferase_type-2_subunit_beta_OS=Homo_sapiens_GN=RABGGTB_PE=1_SV=2	P53611	87.31	Rab geranylgeranyltransferase beta subunit(RABGGTB)	Homo sapiens
comp81331_c0_seq1	0.261073	-0.235464	0.405506	-0.304362	-0.172619	TIAR_HUMAN_Nucleolysin_TIAR_OS=Homo_sapiens_GN=TIAL1_PE=1_SV=1	Q01085	82.74	TIA1 cytotoxic granule associated RNA binding protein like 1(TIAL1)	Homo sapiens
comp81356_c3_seq1	0.537058	0.0499538	0.456869	-1.01088	-0.326904	DNJA1_PONAB_DnaJ_homolog_subfamily_A_member_1_OS=Pongo_abelii_GN=DNAJA1_PE=2_SV=1	Q5NVI9	73.68	DnaJ heat shock protein family (Hsp40) member A1(DNAJA1)	Pongo abelii
comp81356_c3_seq10	0.294788	0.065217	0.473033	-0.90469	-0.540918	DNJA4_MOUSE_DnaJ_homolog_subfamily_A_member_4_OS=Mus_musculus_GN=Dnaja4_PE=2_SV=1	Q9JMC3	75.08	DnaJ heat shock protein family (Hsp40) member A4(Dnaja4)	Mus musculus
comp81447_c0_seq21	0.568705	-0.106323	0.482313	-0.551335	-0.0453822	YAED1_HUMAN_Yae1_domain-containing_protein_1_OS=Homo_sapiens_GN=YAE1D1_PE=1_SV=1	Q9NRH1	27.98	Yae1 domain containing 1(YAE1D1)	Homo sapiens
comp81447_c0_seq7	0.442524	-0.0328355	0.569589	-0.454632	-0.24103	YAED1_HUMAN_Yae1_domain-containing_protein_1_OS=Homo_sapiens_GN=YAE1D1_PE=1_SV=1	Q9NRH1	29.47	Yae1 domain containing 1(YAE1D1)	Homo sapiens
comp81463_c1_seq2	0.326979	-0.150561	0.379658	-0.0145702	-0.268831	HIF1A_ONCMY_Hypoxia-inducible_factor_1-alpha_OS=Oncorhynchus_mykiss_GN=hif1a_PE=2_SV=1	Q98SW2	43.32	hypoxia-inducible factor 1 alpha(hif-1a)	Oncorhynchus mykiss
comp81473_c2_seq2	0.569696	0.0420671	0.572247	-0.456518	-0.0743643	GLBL2_HUMAN_Beta-galactosidase-1-like_protein_2_OS=Homo_sapiens_GN=GLB1L2_PE=2_SV=1	Q8IW92	53.96	galactosidase beta 1 like 2(GLB1L2)	Homo sapiens
comp81476_c2_seq11	0.36122	-0.537349	0.385964	-0.952689	-0.0253002	LYRM7_DANRE_LYR_motif-containing_protein_7_OS=Danio_rerio_GN=lyrm7_PE=3_SV=1	A5PLG0	84.62	LYR motif containing 7(lyrm7)	Danio rerio
comp81478_c3_seq2	0.314797	-0.0694623	0.373955	-0.772309	-0.457314	FGL1_RAT_Fibrinogen-like_protein_1_OS=Rattus_norvegicus_GN=Fgl1_PE=2_SV=1	Q5M8C6	68.21	fibrinogen-like 1(Fgl1)	Rattus norvegicus
comp81501_c1_seq3	0.638686	-0.0972985	0.355459	-0.694915	-0.244027	DNJB9_PONAB_DnaJ_homolog_subfamily_B_member_9_OS=Pongo_abelii_GN=DNAJB9_PE=2_SV=1	Q5R9A4	68.02	DnaJ heat shock protein family (Hsp40) member B9(DNAJB9)	Pongo abelii
comp81514_c1_seq9	0.318504	-0.216592	0.438952	-0.139913	-0.11496	NOL8_MOUSE_Nucleolar_protein_8_OS=Mus_musculus_GN=Nol8_PE=1_SV=2	Q3UHX0	36.39	nucleolar protein 8(Nol8)	Mus musculus
comp81541_c0_seq2	0.586164	-0.171635	0.495133	0.0142848	-0.327696	STB1A_DANRE_Histone-lysine_N-methyltransferase_SETDB1-A_OS=Danio_rerio_GN=setdb1a_PE=2_SV=1	Q1L8U8	74.51	SET domain, bifurcated 1a(setdb1a)	Danio rerio
comp81600_c0_seq3	0.405497	-0.0733881	0.5051	-0.212146	0.0219762	HYOU1_DANRE_Hypoxia_up-regulated_protein_1_OS=Danio_rerio_GN=hyou1_PE=2_SV=1	Q7ZUW2	95.02	hypoxia up-regulated 1(hyou1)	Danio rerio
comp81615_c2_seq6	0.79463	-0.11876	0.439874	-0.503074	-0.159813	THAP4_BOVIN_THAP_domain-containing_protein_4_OS=Bos_taurus_GN=THAP4_PE=2_SV=2	Q2TBI2	63.53	THAP domain containing 4(THAP4)	Bos taurus
comp81621_c1_seq1	0.321599	-0.142296	0.36351	-0.789681	-0.210078	RBX1_MOUSE_E3_ubiquitin-protein_ligase_RBX1_OS=Mus_musculus_GN=Rbx1_PE=1_SV=1	P62878	97.22	ring-box 1(Rbx1)	Mus musculus
comp81621_c1_seq3	0.310643	-0.160987	0.391224	-0.873054	-0.183984	RBX1_MOUSE_E3_ubiquitin-protein_ligase_RBX1_OS=Mus_musculus_GN=Rbx1_PE=1_SV=1	P62878	97.22	ring-box 1(Rbx1)	Mus musculus
comp81686_c0_seq6	0.365195	-0.096933	0.680245	-0.123203	-0.09761	F175A_DANRE_BRCA1-A_complex_subunit_Abraxas_OS=Danio_rerio_GN=fam175a_PE=2_SV=1	Q1LVP6	84.91	family with sequence similarity 175, member A(fam175a)	Danio rerio
comp81734_c2_seq1	0.404909	-0.118027	0.351559	-0.584114	-0.100125	PHOCN_CHICK_MOB-like_protein_phocein_OS=Gallus_gallus_GN=MOB4_PE=2_SV=1	Q5F495	95.86	MOB family member 4, phocein(MOB4)	Gallus gallus
comp81734_c2_seq10	0.3537	-0.127563	0.267638	-0.438296	-0.212648	PHOCN_CHICK_MOB-like_protein_phocein_OS=Gallus_gallus_GN=MOB4_PE=2_SV=1	Q5F495	89.85	MOB family member 4, phocein(MOB4)	Gallus gallus
comp81734_c2_seq20	0.360581	-0.148248	0.466239	-0.58824	-0.129474	PHOCN_CHICK_MOB-like_protein_phocein_OS=Gallus_gallus_GN=MOB4_PE=2_SV=1	Q5F495	95.86	MOB family member 4, phocein(MOB4)	Gallus gallus
comp81736_c0_seq11	0.407439	0.0566227	0.504524	-0.54486	-0.394766	COA5_DANRE_Cytochrome_c_oxidase_assembly_factor_5_OS=Danio_rerio_GN=coa5_PE=3_SV=1	Q0P451	91.89	cytochrome C oxidase assembly factor 5(coa5)	Danio rerio
comp81736_c0_seq18	0.211128	-0.131584	0.366121	-0.78937	-0.311129	COA5_DANRE_Cytochrome_c_oxidase_assembly_factor_5_OS=Danio_rerio_GN=coa5_PE=3_SV=1	Q0P451	91.89	cytochrome C oxidase assembly factor 5(coa5)	Danio rerio
comp81737_c1_seq28	0.203226	-0.0318604	0.445293	-0.207567	-0.184915	P4R2A_DANRE_Serine/threonine-protein_phosphatase_4_regulatory_subunit_2-A_OS=Danio_rerio_GN=ppp4r2a_PE=2_SV=2	Q6P964	76.47	protein phosphatase 4, regulatory subunit 2a(ppp4r2a)	Danio rerio
comp81752_c1_seq2	0.502084	-0.384577	0.40178	-0.251094	-0.00986131	MDC1_RAT_Mediator_of_DNA_damage_checkpoint_protein_1_OS=Rattus_norvegicus_GN=Mdc1_PE=2_SV=2	Q5U2M8	54.17	mediator of DNA damage checkpoint 1(Mdc1)	Rattus norvegicus
comp81799_c3_seq1	0.586964	-0.0479857	0.525134	-0.176586	0.0812318	PDIA6_MOUSE_Protein_disulfide-isomerase_A6_OS=Mus_musculus_GN=Pdia6_PE=1_SV=3	Q922R8	78.81	protein disulfide isomerase associated 6(Pdia6)	Mus musculus
comp81799_c3_seq2	0.512539	-0.285998	0.467608	-0.371486	0.0776266	PDIA6_MOUSE_Protein_disulfide-isomerase_A6_OS=Mus_musculus_GN=Pdia6_PE=1_SV=3	Q922R8	78.52	protein disulfide isomerase associated 6(Pdia6)	Mus musculus
comp81799_c3_seq4	0.498154	-0.0534407	0.480263	-0.236951	0.0434163	PDIA6_MOUSE_Protein_disulfide-isomerase_A6_OS=Mus_musculus_GN=Pdia6_PE=1_SV=3	Q922R8	78.81	protein disulfide isomerase associated 6(Pdia6)	Mus musculus
comp81849_c0_seq29	0.483021	-0.126513	0.723445	-0.401144	-0.0574497	UAP1_HUMAN_UDP-N-acetylhexosamine_pyrophosphorylase_OS=Homo_sapiens_GN=UAP1_PE=1_SV=3	Q16222	84.02	UDP-N-acetylglucosamine pyrophosphorylase 1(UAP1)	Homo sapiens
comp81849_c0_seq3	0.269688	-0.0210613	0.378404	-0.400392	-0.32242	UAP1_MOUSE_UDP-N-acetylhexosamine_pyrophosphorylase_OS=Mus_musculus_GN=Uap1_PE=1_SV=1	Q91YN5	75.94	UDP-N-acetylglucosamine pyrophosphorylase 1(Uap1)	Mus musculus
comp81849_c0_seq33	0.565185	-0.481592	0.721182	-0.324761	-0.303652	UAP1_MOUSE_UDP-N-acetylhexosamine_pyrophosphorylase_OS=Mus_musculus_GN=Uap1_PE=1_SV=1	Q91YN5	73.29	UDP-N-acetylglucosamine pyrophosphorylase 1(Uap1)	Mus musculus
comp81849_c0_seq42	0.235962	-0.219766	0.430447	-0.202777	-0.237297	UAP1_MOUSE_UDP-N-acetylhexosamine_pyrophosphorylase_OS=Mus_musculus_GN=Uap1_PE=1_SV=1	Q91YN5	73.18	UDP-N-acetylglucosamine pyrophosphorylase 1(Uap1)	Mus musculus
comp81849_c0_seq5	0.315086	-0.107123	0.326012	-0.40601	-0.0680812	UAP1_HUMAN_UDP-N-acetylhexosamine_pyrophosphorylase_OS=Homo_sapiens_GN=UAP1_PE=1_SV=3	Q16222	83.16	UDP-N-acetylglucosamine pyrophosphorylase 1(UAP1)	Homo sapiens
comp81867_c1_seq5	0.806558	-0.110182	0.783981	-0.258838	0.131771	MRGBP_MOUSE_MRG-binding_protein_OS=Mus_musculus_GN=Mrgbp_PE=2_SV=1	Q9DAT2	79.17	MRG/MORF4L binding protein(Mrgbp)	Mus musculus
comp81867_c1_seq6	0.645909	-0.134266	0.564953	-0.408814	-0.132706	MRGBP_MOUSE_MRG-binding_protein_OS=Mus_musculus_GN=Mrgbp_PE=2_SV=1	Q9DAT2	79.17	MRG/MORF4L binding protein(Mrgbp)	Mus musculus
comp81904_c1_seq27	0.486706	-0.505484	1.39178	-0.570839	0.101154	DHX8_MOUSE_ATP-dependent_RNA_helicase_DHX8_OS=Mus_musculus_GN=Dhx8_PE=2_SV=1	A2A4P0	96.51	DEAH (Asp-Glu-Ala-His) box polypeptide 8(Dhx8)	Mus musculus
comp81940_c0_seq2	0.400262	-0.0607694	0.354437	-0.577585	-0.0684869	ETFD_PIG_Electron_transfer_flavoprotein-ubiquinone_oxidoreductase,_mitochondrial_OS=Sus_scrofa_GN=ETFDH_PE=1_SV=2	P55931	81.07	electron-transferring-flavoprotein dehydrogenase(ETFDH)	Sus scrofa
comp81940_c0_seq3	0.502799	-0.164941	0.412571	-0.86639	-0.259565	PPID_BOVIN_Peptidyl-prolyl_cis-trans_isomerase_D_OS=Bos_taurus_GN=PPID_PE=1_SV=6	P26882	80.48	peptidylprolyl isomerase D(PPID)	Bos taurus
comp81996_c0_seq2	0.476552	-0.100739	0.461277	-0.180567	0.0801918	ITB1_HUMAN_Integrin_beta-1_OS=Homo_sapiens_GN=ITGB1_PE=1_SV=2	P05556	74.01	integrin subunit beta 1(ITGB1)	Homo sapiens
comp81996_c0_seq30	0.327555	-0.178473	0.333179	-0.137814	-0.0858822	ITB1_HUMAN_Integrin_beta-1_OS=Homo_sapiens_GN=ITGB1_PE=1_SV=2	P05556	73.2	integrin subunit beta 1(ITGB1)	Homo sapiens
comp82003_c1_seq12	0.392466	0.0174494	0.407025	-0.199601	-0.149926	AIFM1_HUMAN_Apoptosis-inducing_factor_1,_mitochondrial_OS=Homo_sapiens_GN=AIFM1_PE=1_SV=1	O95831	80	apoptosis inducing factor, mitochondria associated 1(AIFM1)	Homo sapiens
comp82129_c1_seq2	0.442297	-0.0247092	0.834874	-0.285051	-0.142008	VNX1_YEAST_Low_affinity_vacuolar_monovalent_cation/H(+)_antiporter_OS=Saccharomyces_cerevisiae_(strain_ATCC_204508_/_S288c)_GN=VNX1_PE=1_SV=1	P42839	29.73	Vnx1p(VNX1)	Saccharomyces cerevisiae S288C
comp82203_c2_seq32	0.458461	-0.189579	0.350922	-0.454214	-0.0775426	CLASR_RAT_CLK4-associating_serine/arginine_rich_protein_OS=Rattus_norvegicus_GN=Clasrp_PE=2_SV=2	Q5HZB6	81.07	CLK4-associating serine/arginine rich protein(Clasrp)	Rattus norvegicus
comp82207_c0_seq1	0.32403	-0.011611	0.495517	-0.192501	-0.178805	CA050_DANRE_Uncharacterized_protein_C1orf50_homolog_OS=Danio_rerio_GN=zgc:112255_PE=2_SV=1	Q502G5	91.01	zgc:112255(zgc:112255)	Danio rerio
comp82217_c1_seq2	0.475707	-0.0292023	0.552441	-0.768088	-0.118965	ELOC_RAT_Transcription_elongation_factor_B_polypeptide_1_OS=Rattus_norvegicus_GN=Tceb1_PE=1_SV=1	P83941	98.84	transcription elongation factor B subunit 1(Tceb1)	Rattus norvegicus
comp82224_c1_seq3	0.514911	-0.0875327	0.574955	-0.37254	0.062453	PAPS2_HUMAN_Bifunctional_3'-phosphoadenosine_5'-phosphosulfate_synthase_2_OS=Homo_sapiens_GN=PAPSS2_PE=1_SV=2	O95340	81.92	3'-phosphoadenosine 5'-phosphosulfate synthase 2(PAPSS2)	Homo sapiens
comp82263_c0_seq2	0.600021	-0.292202	0.33853	-0.668202	-0.122917	MED30_DANRE_Mediator_of_RNA_polymerase_II_transcription_subunit_30_OS=Danio_rerio_GN=med30_PE=2_SV=1	Q6PC45	51.76	mediator complex subunit 30(med30)	Danio rerio
comp82281_c0_seq2	0.487285	-0.749062	0.438965	-0.746583	-0.0398145	PERQ2_DANRE_PERQ_amino_acid-rich_with_GYF_domain-containing_protein_2_OS=Danio_rerio_GN=gigyf2_PE=2_SV=1	Q4KME6	82.58	GRB10 interacting GYF protein 2(gigfy2)	Danio rerio
comp82370_c1_seq19	0.424271	0.154378	0.762842	-0.722121	-0.0921095	VEGFD_MOUSE_Vascular_endothelial_growth_factor_D_OS=Mus_musculus_GN=Figf_PE=2_SV=1	P97946	46.67	vascular endothelial growth factor D(Vegfd)	Mus musculus
comp82372_c0_seq3	0.485106	-0.133559	0.426967	-0.335079	-0.027928	ENPL_BOVIN_Endoplasmin_OS=Bos_taurus_GN=HSP90B1_PE=2_SV=1	Q95M18	85.11	heat shock protein 90 beta family member 1(HSP90B1)	Bos taurus
comp82372_c0_seq4	0.472221	-0.0940529	0.453966	-0.330393	-0.0680072	ENPL_BOVIN_Endoplasmin_OS=Bos_taurus_GN=HSP90B1_PE=2_SV=1	Q95M18	85.37	heat shock protein 90 beta family member 1(HSP90B1)	Bos taurus
comp82380_c4_seq3	0.153612	-0.0206097	0.366286	-1.34439	-0.676898	INO1A_XENLA_Inositol-3-phosphate_synthase_1-A_OS=Xenopus_laevis_GN=isyna1-a_PE=2_SV=1	Q7ZXY0	77.65	inositol-3-phosphate synthase 1 S homeolog(isyna1.S)	Xenopus laevis
comp82380_c4_seq7	0.423963	-0.079944	0.575406	-1.02952	-0.465891	INO1A_XENLA_Inositol-3-phosphate_synthase_1-A_OS=Xenopus_laevis_GN=isyna1-a_PE=2_SV=1	Q7ZXY0	77.65	inositol-3-phosphate synthase 1 S homeolog(isyna1.S)	Xenopus laevis
comp82416_c1_seq2	0.83842	-0.549635	1.79327	-0.564511	-0.418312	TONSL_DANRE_Tonsoku-like_protein_OS=Danio_rerio_GN=tonsl_PE=2_SV=1	A9JR78	91.78	tonsoku-like, DNA repair protein(tonsl)	Danio rerio
comp82495_c2_seq6	0.525183	-0.13716	0.303993	-0.708793	-0.839777	HS90A_CHICK_Heat_shock_protein_HSP_90-alpha_OS=Gallus_gallus_GN=HSP90AA1_PE=3_SV=3	P11501	89.26	heat shock protein 90kDa alpha (cytosolic), class A member 1(HSP90AA1)	Gallus gallus
comp82520_c7_seq1	0.28738	-0.121557	0.363548	-0.946203	-0.137222	OSTC_DANRE_Oligosaccharyltransferase_complex_subunit_ostc_OS=Danio_rerio_GN=ostc_PE=2_SV=1	Q7ZWJ3	99.31	oligosaccharyltransferase complex subunit(ostc)	Danio rerio
comp82568_c1_seq2	0.314853	0.00613403	0.407797	-0.409953	-0.30323	P2RX4_RAT_P2X_purinoceptor_4_OS=Rattus_norvegicus_GN=P2rx4_PE=1_SV=1	P51577	60.9	purinergic receptor P2X 4(P2rx4)	Rattus norvegicus
comp82585_c0_seq20	0.281759	-0.3984	0.729741	-1.1761	-0.105977	TARSH_HUMAN_Target_of_Nesh-SH3_OS=Homo_sapiens_GN=ABI3BP_PE=1_SV=1	Q7Z7G0	69.41	ABI family member 3 binding protein(ABI3BP)	Homo sapiens
comp82611_c0_seq3	0.447953	-0.344836	0.365978	-0.485606	-0.0876153	NGRN_PONAB_Neugrin_OS=Pongo_abelii_GN=NGRN_PE=2_SV=2	Q5R7E7	33.22	neugrin, neurite outgrowth associated(NGRN)	Pongo abelii
comp82611_c0_seq4	0.580502	-0.229595	0.439659	-0.78571	0.028371	NGRN_PONAB_Neugrin_OS=Pongo_abelii_GN=NGRN_PE=2_SV=2	Q5R7E7	33.5	neugrin, neurite outgrowth associated(NGRN)	Pongo abelii
comp82615_c0_seq2	0.50274	-0.0829392	0.660018	-0.507215	0.0488663	TSP4B_DANRE_Thrombospondin-4-B_OS=Danio_rerio_GN=thbs4b_PE=2_SV=1	Q8JGW0	94.11	thrombospondin 4b(thbs4b)	Danio rerio
comp82615_c0_seq4	0.420127	-0.0565761	0.50043	-0.642104	-0.104018	TSP4B_DANRE_Thrombospondin-4-B_OS=Danio_rerio_GN=thbs4b_PE=2_SV=1	Q8JGW0	94.53	thrombospondin 4b(thbs4b)	Danio rerio
comp82693_c1_seq1	0.219068	-0.067204	0.338017	-0.0743777	-0.264999	SPAG5_HUMAN_Sperm-associated_antigen_5_OS=Homo_sapiens_GN=SPAG5_PE=1_SV=2	Q96R06	24.47	sperm associated antigen 5(SPAG5)	Homo sapiens
comp82708_c0_seq3	0.324423	-0.0151032	0.505436	-0.361448	-0.343073	LONF1_HUMAN_LON_peptidase_N-terminal_domain_and_RING_finger_protein_1_OS=Homo_sapiens_GN=LONRF1_PE=2_SV=2	Q17RB8	74.04	LON peptidase N-terminal domain and ring finger 1(LONRF1)	Homo sapiens
comp82753_c2_seq3	0.401027	-0.229178	0.54841	-0.176025	-0.0833012	FANCJ_HUMAN_Fanconi_anemia_group_J_protein_OS=Homo_sapiens_GN=BRIP1_PE=1_SV=1	Q9BX63	68.1	BRCA1 interacting protein C-terminal helicase 1(BRIP1)	Homo sapiens
comp82884_c0_seq1	0.315491	-0.0694453	0.35202	-0.270563	-0.165308	CCD93_CHICK_Coiled-coil_domain-containing_protein_93_OS=Gallus_gallus_GN=CCDC93_PE=2_SV=1	Q5ZKI4	77.72	coiled-coil domain containing 93(CCDC93)	Gallus gallus
comp82953_c3_seq1	0.262098	-0.362953	0.261207	0.0153673	-0.245409	DDR2_HUMAN_Discoidin_domain-containing_receptor_2_OS=Homo_sapiens_GN=DDR2_PE=1_SV=2	Q16832	71.7	discoidin domain receptor tyrosine kinase 2(DDR2)	Homo sapiens
comp82993_c1_seq4	0.447669	-0.0737878	0.704929	-0.392379	-0.265583	HECD3_MOUSE_E3_ubiquitin-protein_ligase_HECTD3_OS=Mus_musculus_GN=Hectd3_PE=1_SV=2	Q3U487	77.78	HECT domain containing 3(Hectd3)	Mus musculus
comp83014_c0_seq7	0.353904	-0.240146	0.378431	-0.459926	-0.0836948	DDX20_DANRE_Probable_ATP-dependent_RNA_helicase_DDX20_OS=Danio_rerio_GN=ddx20_PE=2_SV=1	P0C218	79.5	DEAD (Asp-Glu-Ala-Asp) box polypeptide 20(ddx20)	Danio rerio
comp83030_c0_seq10	0.609506	-0.321879	0.454598	-0.333083	0.00811561	RRBP1_HUMAN_Ribosome-binding_protein_1_OS=Homo_sapiens_GN=RRBP1_PE=1_SV=4	Q9P2E9	35.38	ribosome binding protein 1(RRBP1)	Homo sapiens
comp83030_c0_seq11	0.695389	-0.412206	0.756407	-0.151055	-0.069603	RRBP1_CANFA_Ribosome-binding_protein_1_OS=Canis_familiaris_GN=RRBP1_PE=2_SV=1	Q28298	40	ribosome binding protein 1(RRBP1)	Canis lupus familiaris
comp83030_c0_seq4	0.297077	-0.684133	0.261078	-0.163886	-0.1422	RRBP1_CANFA_Ribosome-binding_protein_1_OS=Canis_familiaris_GN=RRBP1_PE=2_SV=1	Q28298	42.24	ribosome binding protein 1(RRBP1)	Canis lupus familiaris
comp83041_c3_seq1	0.288743	0.00392628	0.421195	-0.521731	-0.127303	DIEXF_DANRE_Digestive_organ_expansion_factor_OS=Danio_rerio_GN=diexf_PE=2_SV=2	Q6PEH4	83.98	digestive organ expansion factor homolog(diexf)	Danio rerio
comp83069_c1_seq11	0.403739	-0.33464	0.465471	-0.0626063	-0.0974369	MATR3_MOUSE_Matrin-3_OS=Mus_musculus_GN=Matr3_PE=1_SV=1	Q8K310	36.11	matrin 3(Matr3)	Mus musculus
comp83069_c1_seq8	0.377701	-0.349883	0.492146	-0.0987342	-0.118031	ZN638_HUMAN_Zinc_finger_protein_638_OS=Homo_sapiens_GN=ZNF638_PE=1_SV=2	Q14966	66.28	zinc finger protein 638(ZNF638)	Homo sapiens
comp83089_c0_seq3	0.416896	-0.0925919	0.370609	-0.134265	-0.0554301	AKT2_MOUSE_RAC-beta_serine/threonine-protein_kinase_OS=Mus_musculus_GN=Akt2_PE=1_SV=1	Q60823	81.63	thymoma viral proto-oncogene 2(Akt2)	Mus musculus
comp83094_c0_seq1	0.603704	-0.503711	0.503939	-0.541458	-0.248153	RAGP1_XENLA_Ran_GTPase-activating_protein_1_OS=Xenopus_laevis_GN=rangap1_PE=2_SV=1	O13066	58.82	Ran GTPase activating protein 1 S homeolog(rangap1.S)	Xenopus laevis
comp83100_c0_seq5	0.357549	-0.0481663	0.384527	-0.194215	-0.0226679	HIRA_TAKRU_Protein_HIRA_OS=Takifugu_rubripes_GN=hira_PE=2_SV=1	O42611	76.8	Tuple1/HirA(hira)	Takifugu rubripes
comp83128_c0_seq4	0.353592	-0.244296	0.342168	-0.269968	-0.103164	Z3H7A_HUMAN_Zinc_finger_CCCH_domain-containing_protein_7A_OS=Homo_sapiens_GN=ZC3H7A_PE=1_SV=1	Q8IWR0	65.57	zinc finger CCCH-type containing 7A(ZC3H7A)	Homo sapiens
comp83135_c0_seq5	0.285279	-0.0132516	0.443724	-0.382112	-0.1527	SMRCD_HUMAN_SWI/SNF-related_matrix-associated_actin-dependent_regulator_of_chromatin_subfamily_A_containing_DEAD/H_box_1_OS=Homo_sapiens_GN=SMARCAD1_PE=1_SV=2	Q9H4L7	68.1	SWI/SNF-related, matrix-associated actin-dependent regulator of chromatin, subfamily a, containing DEAD/H box 1(SMARCAD1)	Homo sapiens
comp83184_c0_seq2	0.515291	-0.125836	0.388181	-0.102575	-0.0639537	SAFB1_MOUSE_Scaffold_attachment_factor_B1_OS=Mus_musculus_GN=Safb_PE=1_SV=2	D3YXK2	40.91	scaffold attachment factor B(Safb)	Mus musculus
comp83225_c0_seq20	0.808268	-0.384079	0.700963	-1.03881	-0.0572174	SRS1B_DANRE_Serine/arginine-rich_splicing_factor_1B_OS=Danio_rerio_GN=srsf1b_PE=2_SV=1	Q6NYA0	98.82	serine/arginine-rich splicing factor 1b(srsf1b)	Danio rerio
comp83245_c0_seq14	0.488305	-1.62092	0.520916	-2.33638	0.0843724	RBM14_MOUSE_RNA-binding_protein_14_OS=Mus_musculus_GN=Rbm14_PE=1_SV=1	Q8C2Q3	54.93	RNA binding motif protein 14(Rbm14)	Mus musculus
comp83331_c1_seq2	0.479212	-0.787051	0.547093	-0.0639524	-0.199521	CP46A_HUMAN_Cholesterol_24-hydroxylase_OS=Homo_sapiens_GN=CYP46A1_PE=1_SV=1	Q9Y6A2	50	cytochrome P450 family 46 subfamily A member 1(CYP46A1)	Homo sapiens
comp83392_c0_seq5	0.356362	-0.398525	0.332212	-0.357002	-0.0628374	AP3B1_BOVIN_AP-3_complex_subunit_beta-1_OS=Bos_taurus_GN=AP3B1_PE=2_SV=1	Q32PG1	55.67	adaptor related protein complex 3 beta 1 subunit(AP3B1)	Bos taurus
comp83482_c1_seq2	0.402758	-0.101558	0.712069	-0.191521	-0.00321786	SETD7_DANRE_Histone-lysine_N-methyltransferase_SETD7_OS=Danio_rerio_GN=setd7_PE=2_SV=1	Q6DHG0	92.27	SET domain containing (lysine methyltransferase) 7(setd7)	Danio rerio
comp83556_c1_seq1	0.36154	-0.0745823	0.371862	-0.743761	-0.0708923	PRS6B_RAT_26S_protease_regulatory_subunit_6B_OS=Rattus_norvegicus_GN=Psmc4_PE=1_SV=1	Q63570	97.87	proteasome 26S subunit, ATPase 4(Psmc4)	Rattus norvegicus
comp83556_c1_seq4	0.402155	-0.0992266	0.472707	-0.468622	-0.0199664	PRS6B_RAT_26S_protease_regulatory_subunit_6B_OS=Rattus_norvegicus_GN=Psmc4_PE=1_SV=1	Q63570	97.87	proteasome 26S subunit, ATPase 4(Psmc4)	Rattus norvegicus
comp83574_c1_seq2	0.425157	0.0291608	0.554263	-0.337034	-0.175442	CH60_RAT_60_kDa_heat_shock_protein,_mitochondrial_OS=Rattus_norvegicus_GN=Hspd1_PE=1_SV=1	P63039	88.83	heat shock protein family D member 1(Hspd1)	Rattus norvegicus
comp83589_c0_seq15	0.486031	0.0300784	0.604734	-0.279354	-0.227149	MPP10_HUMAN_U3_small_nucleolar_ribonucleoprotein_protein_MPP10_OS=Homo_sapiens_GN=MPHOSPH10_PE=1_SV=2	O00566	68.7	M-phase phosphoprotein 10(MPHOSPH10)	Homo sapiens
comp83589_c0_seq3	0.461022	-0.159345	0.564554	-0.125153	-0.0403784	MPP10_MOUSE_U3_small_nucleolar_ribonucleoprotein_protein_MPP10_OS=Mus_musculus_GN=Mphosph10_PE=1_SV=2	Q810V0	61.18	M-phase phosphoprotein 10 (U3 small nucleolar ribonucleoprotein)(Mphosph10)	Mus musculus
comp83616_c0_seq24	0.803338	-0.328108	0.405203	-0.235485	-0.142482	DNLI3_MOUSE_DNA_ligase_3_OS=Mus_musculus_GN=Lig3_PE=1_SV=2	P97386	69.55	ligase III, DNA, ATP-dependent(Lig3)	Mus musculus
comp83711_c1_seq11	0.404513	-0.104246	0.483986	-0.399697	-0.0515534	NXP20_HUMAN_Protein_NOXP20_OS=Homo_sapiens_GN=FAM114A1_PE=1_SV=2	Q8IWE2	52.16	family with sequence similarity 114 member A1(FAM114A1)	Homo sapiens
comp83711_c1_seq2	0.338268	-0.274298	0.346413	-0.472388	-0.275226	NXP20_HUMAN_Protein_NOXP20_OS=Homo_sapiens_GN=FAM114A1_PE=1_SV=2	Q8IWE2	54.88	family with sequence similarity 114 member A1(FAM114A1)	Homo sapiens
comp83782_c0_seq1	0.619195	-0.0114854	0.400132	-0.392272	-0.15263	SYLC_PONAB_Leucine--tRNA_ligase,_cytoplasmic_OS=Pongo_abelii_GN=LARS_PE=2_SV=1	Q5R614	71.01	leucyl-tRNA synthetase(LARS)	Pongo abelii
comp83782_c0_seq4	0.443894	-0.196863	0.46418	-0.532358	-0.169364	SYLC_PONAB_Leucine--tRNA_ligase,_cytoplasmic_OS=Pongo_abelii_GN=LARS_PE=2_SV=1	Q5R614	71.01	leucyl-tRNA synthetase(LARS)	Pongo abelii
comp83793_c0_seq16	0.663304	-0.385125	0.743144	-0.199924	-0.08933	PUR1_CHICK_Amidophosphoribosyltransferase_OS=Gallus_gallus_GN=PPAT_PE=2_SV=1	P28173	77.25	phosphoribosyl pyrophosphate amidotransferase(PPAT)	Gallus gallus
comp83793_c0_seq22	0.400252	-0.107985	0.469405	-0.927955	-0.00559314	PUR1_CHICK_Amidophosphoribosyltransferase_OS=Gallus_gallus_GN=PPAT_PE=2_SV=1	P28173	77.25	phosphoribosyl pyrophosphate amidotransferase(PPAT)	Gallus gallus
comp83837_c0_seq1	0.622869	-0.217747	0.59808	-0.207612	-0.0109126	PDIA4_HUMAN_Protein_disulfide-isomerase_A4_OS=Homo_sapiens_GN=PDIA4_PE=1_SV=2	P13667	78.88	protein disulfide isomerase family A member 4(PDIA4)	Homo sapiens
comp83837_c0_seq4	0.40508	-0.0888287	0.442733	-0.189337	-0.0608816	CEBPZ_HUMAN_CCAAT/enhancer-binding_protein_zeta_OS=Homo_sapiens_GN=CEBPZ_PE=1_SV=3	Q03701	58.56	CCAAT/enhancer binding protein zeta(CEBPZ)	Homo sapiens
comp83837_c0_seq5	0.405507	-0.226145	0.468492	-0.134031	-0.0503556	PDIA4_HUMAN_Protein_disulfide-isomerase_A4_OS=Homo_sapiens_GN=PDIA4_PE=1_SV=2	P13667	73.94	protein disulfide isomerase family A member 4(PDIA4)	Homo sapiens
comp83837_c0_seq6	0.455945	-0.0790068	0.454883	0.0357456	-0.047026	CEBPZ_HUMAN_CCAAT/enhancer-binding_protein_zeta_OS=Homo_sapiens_GN=CEBPZ_PE=1_SV=3	Q03701	58.56	CCAAT/enhancer binding protein zeta(CEBPZ)	Homo sapiens
comp83837_c0_seq8	0.681346	-0.374923	0.677916	-0.320196	-0.0144955	PDIA4_HUMAN_Protein_disulfide-isomerase_A4_OS=Homo_sapiens_GN=PDIA4_PE=1_SV=2	P13667	80.75	protein disulfide isomerase family A member 4(PDIA4)	Homo sapiens
comp83897_c0_seq4	0.370203	-0.268332	0.467339	-0.501418	-0.084002	SMCA4_BOVIN_Transcription_activator_BRG1_OS=Bos_taurus_GN=SMARCA4_PE=2_SV=1	A7Z019	79.88	SWI/SNF related, matrix associated, actin dependent regulator of chromatin, subfamily a, member 4(SMARCA4)	Bos taurus
comp83952_c0_seq46	0.365774	-0.274292	0.293898	-0.066484	-0.111076	ITA10_HUMAN_Integrin_alpha-10_OS=Homo_sapiens_GN=ITGA10_PE=2_SV=2	O75578	54.16	integrin subunit alpha 10(ITGA10)	Homo sapiens
comp83952_c0_seq48	0.353493	-0.308199	0.431156	-0.138181	-0.0716734	ITA10_HUMAN_Integrin_alpha-10_OS=Homo_sapiens_GN=ITGA10_PE=2_SV=2	O75578	54.16	integrin subunit alpha 10(ITGA10)	Homo sapiens
comp83952_c0_seq56	0.407333	-0.334112	0.446283	-0.124349	-0.084373	ITA10_HUMAN_Integrin_alpha-10_OS=Homo_sapiens_GN=ITGA10_PE=2_SV=2	O75578	54.07	integrin subunit alpha 10(ITGA10)	Homo sapiens
comp83952_c0_seq62	0.549253	-0.234372	0.627125	-0.105372	0.110131	ITA10_HUMAN_Integrin_alpha-10_OS=Homo_sapiens_GN=ITGA10_PE=2_SV=2	O75578	54.07	integrin subunit alpha 10(ITGA10)	Homo sapiens
comp84029_c4_seq6	0.262316	-0.172659	0.247435	-0.324978	-0.165462	CLD19_MOUSE_Claudin-19_OS=Mus_musculus_GN=Cldn19_PE=2_SV=3	Q9ET38	73.46	claudin 19(Cldn19)	Mus musculus
comp84096_c0_seq1	0.466413	0.00982142	0.524607	-0.488734	-0.139848	IAAA_SALTY_Isoaspartyl_peptidase_OS=Salmonella_typhimurium_GN=iaaA_PE=1_SV=1	Q7CQV5	41.5	isoaspartyl peptidase(iaaA)	Salmonella enterica subsp. enterica serovar Typhimurium str. LT2
comp84133_c0_seq3	0.284841	-0.739273	0.320024	-0.0277211	-0.18346	SF3B1_MOUSE_Splicing_factor_3B_subunit_1_OS=Mus_musculus_GN=Sf3b1_PE=1_SV=1	Q99NB9	82.98	splicing factor 3b, subunit 1(Sf3b1)	Mus musculus
comp84188_c1_seq6	0.39323	-0.468488	0.62294	0.0210292	-0.104215	PROF2_PONAB_Profilin-2_OS=Pongo_abelii_GN=PFN2_PE=2_SV=3	Q5R4E2	75	profilin 2(PFN2)	Pongo abelii
comp84300_c5_seq2	0.435772	-0.160098	0.592275	-0.208888	0.0170863	TSP1L_DANRE_tRNA_selenocysteine_1-associated_protein_1-like_OS=Danio_rerio_GN=trnau1apl_PE=2_SV=1	Q4KM14	75.81	tRNA selenocysteine 1 associated protein 1b(trnau1apb)	Danio rerio
comp84347_c2_seq1	0.587959	-0.0525792	0.434273	-1.04619	0.0240912	LEO1_DANRE_RNA_polymerase-associated_protein_LEO1_OS=Danio_rerio_GN=leo1_PE=2_SV=1	Q6NYV9	77.53	LEO1 homolog, Paf1/RNA polymerase II complex component(leo1)	Danio rerio
comp84347_c2_seq4	0.423826	-0.024319	0.595233	-0.177214	-0.00301425	LEO1_DANRE_RNA_polymerase-associated_protein_LEO1_OS=Danio_rerio_GN=leo1_PE=2_SV=1	Q6NYV9	78.77	LEO1 homolog, Paf1/RNA polymerase II complex component(leo1)	Danio rerio
comp84349_c0_seq3	0.275759	0.0463826	0.468459	-0.632968	-0.256043	INT6_MOUSE_Integrator_complex_subunit_6_OS=Mus_musculus_GN=Ints6_PE=2_SV=1	Q6PCM2	65.69	integrator complex subunit 6(Ints6)	Mus musculus
comp84353_c1_seq7	0.44015	0.0213497	0.462352	-0.214686	-0.178516	POLK_HUMAN_DNA_polymerase_kappa_OS=Homo_sapiens_GN=POLK_PE=1_SV=1	Q9UBT6	63.26	DNA polymerase kappa(POLK)	Homo sapiens
comp84605_c0_seq4	0.328905	-0.262184	0.414131	-0.50777	-0.227658	NGLY1_DANRE_Peptide-N(4)-(N-acetyl-beta-glucosaminyl)asparagine_amidase_OS=Danio_rerio_GN=ngly1_PE=2_SV=1	Q503I8	81.29	N-glycanase 1(ngly1)	Danio rerio
comp84664_c0_seq3	0.550809	-0.0447044	0.488895	-0.457613	0.102502	RRAGA_RAT_Ras-related_GTP-binding_protein_A_OS=Rattus_norvegicus_GN=Rraga_PE=1_SV=1	Q63486	96.44	Ras-related GTP binding A(Rraga)	Rattus norvegicus
comp84706_c1_seq10	0.625627	0.0426297	0.458529	-0.303374	-0.116632	QORL1_MOUSE_Quinone_oxidoreductase-like_protein_1_OS=Mus_musculus_GN=Cryzl1_PE=2_SV=1	Q921W4	60.92	crystallin, zeta (quinone reductase)-like 1(Cryzl1)	Mus musculus
comp84908_c2_seq12	0.443574	-0.206224	0.362554	-0.222356	-0.0204935	HSP74_HUMAN_Heat_shock_70_kDa_protein_4_OS=Homo_sapiens_GN=HSPA4_PE=1_SV=4	P34932	71.89	heat shock protein family A (Hsp70) member 4(HSPA4)	Homo sapiens
comp84908_c2_seq5	0.377262	-0.0760581	0.459666	-0.137139	-0.0183859	HSP74_HUMAN_Heat_shock_70_kDa_protein_4_OS=Homo_sapiens_GN=HSPA4_PE=1_SV=4	P34932	73.09	heat shock protein family A (Hsp70) member 4(HSPA4)	Homo sapiens
comp84908_c2_seq7	0.300182	-0.110943	0.407199	-0.161066	-0.0864544	HSP74_RAT_Heat_shock_70_kDa_protein_4_OS=Rattus_norvegicus_GN=Hspa4_PE=1_SV=1	O88600	76.22	heat shock protein family A member 4(Hspa4)	Rattus norvegicus
comp84964_c1_seq13	0.37692	-0.559083	0.19843	-0.0115315	-0.240103	SLTM_HUMAN_SAFB-like_transcription_modulator_OS=Homo_sapiens_GN=SLTM_PE=1_SV=2	Q9NWH9	60.14	SAFB like transcription modulator(SLTM)	Homo sapiens
comp85041_c0_seq2	0.364762	-0.205824	0.294611	-0.104562	-0.159637	YLPM1_MOUSE_YLP_motif-containing_protein_1_OS=Mus_musculus_GN=Ylpm1_PE=2_SV=2	Q9R0I7	61.51	YLP motif containing 1(Ylpm1)	Mus musculus
comp85067_c0_seq11	0.467151	-0.314124	0.461328	-0.114009	0.044301	S23IP_HUMAN_SEC23-interacting_protein_OS=Homo_sapiens_GN=SEC23IP_PE=1_SV=1	Q9Y6Y8	62.09	SEC23 interacting protein(SEC23IP)	Homo sapiens
comp85141_c7_seq13	0.46254	-0.0707156	0.516956	-0.702634	0.0240831	CHMP6_DANRE_Charged_multivesicular_body_protein_6_OS=Danio_rerio_GN=chmp6_PE=2_SV=3	Q503V0	90.59	charged multivesicular body protein 6b(chmp6b)	Danio rerio
comp85152_c0_seq5	0.322467	-0.0982467	0.448881	-0.2498	-0.200085	DGCR8_HUMAN_Microprocessor_complex_subunit_DGCR8_OS=Homo_sapiens_GN=DGCR8_PE=1_SV=1	Q8WYQ5	83.54	DGCR8, microprocessor complex subunit(DGCR8)	Homo sapiens
comp85235_c0_seq8	0.425413	-0.26371	0.515472	-0.215331	-0.0622854	WIZ_HUMAN_Protein_Wiz_OS=Homo_sapiens_GN=WIZ_PE=1_SV=2	O95785	87.5	widely interspaced zinc finger motifs(WIZ)	Homo sapiens
comp85302_c4_seq1	0.384613	-0.922564	0.490744	-0.174184	-0.0364134	ITSN1_HUMAN_Intersectin-1_OS=Homo_sapiens_GN=ITSN1_PE=1_SV=3	Q15811	73.81	intersectin 1(ITSN1)	Homo sapiens
comp85430_c2_seq1	0.454843	-0.171926	0.391303	-0.606648	-0.0598842	TAF1_MOUSE_Transcription_initiation_factor_TFIID_subunit_1_OS=Mus_musculus_GN=Taf1_PE=2_SV=2	Q80UV9	51.94	TATA-box binding protein associated factor 1(Taf1)	Mus musculus
comp85604_c0_seq1	0.264217	-0.385647	0.288006	-1.91893	-0.13446	USMG5_HUMAN_Up-regulated_during_skeletal_muscle_growth_protein_5_OS=Homo_sapiens_GN=USMG5_PE=1_SV=1	Q96IX5	63.79	up-regulated during skeletal muscle growth 5 homolog (mouse)(USMG5)	Homo sapiens
comp85615_c0_seq1	0.431112	-0.191546	0.430709	-0.719997	-0.0534274	RF1ML_RAT_Peptide_chain_release_factor_1-like,_mitochondrial_OS=Rattus_norvegicus_GN=Mtrf1l_PE=2_SV=1	Q4V7E5	68.25	mitochondrial translational release factor 1-like(Mtrf1l)	Rattus norvegicus
comp85916_c0_seq1	0.476907	-0.327818	0.678749	-0.173098	0.0692124	KATL1_DANRE_Katanin_p60_ATPase-containing_subunit_A-like_1_OS=Danio_rerio_GN=katnal1_PE=2_SV=1	Q5U3S1	94.06	katanin p60 subunit A-like 1(katnal1)	Danio rerio
comp86285_c0_seq1	0.387288	-0.162593	0.448108	-0.0765622	0.00422986	PAHX_HUMAN_Phytanoyl-CoA_dioxygenase,_peroxisomal_OS=Homo_sapiens_GN=PHYH_PE=1_SV=1	O14832	67.75	phytanoyl-CoA 2-hydroxylase(PHYH)	Homo sapiens
comp86761_c0_seq1	0.432652	-0.262973	0.314253	-1.08201	-0.0915702	ACN9_DANRE_Protein_ACN9_homolog,_mitochondrial_OS=Danio_rerio_GN=acn9_PE=2_SV=1	Q5XIY4	82.93	succinate dehydrogenase complex assembly factor 3(sdhaf3)	Danio rerio
